# Supplementary material for: Korean Clinical Practice Guidelines for Adverse Reactions to Intravenous Iodinate and MRI-Gadolinium Contrast Agents: Revised Clinical Consensus and Recommendations (3rd Edition, 2022)
Source: PubMed Central journal article supplement — Taehan Yongsang Uihakhoe Chi. 2022 Mar 28;83(2):254–64. [Article in Korean] doi: 10.3348/jksr.2022.0024 (PMC9514440; doi:10.3348/jksr.2022.0024), 2022-03-28
Supplement: jksr-83-254-s001.pdf [file jksr-83-254-s001.pdf]

Supplementary Material

주사용 요오드화 조영제 및  
MRI용 가돌리늄 조영제 유해반응에 관한  
한국 임상진료지침

- 2022년 제3판 -

주관: 대한영상의학회

공동제작: 대한천식알레르기학회, 대한신장학회, 대한영상의학회

# 차례

## 요약문

## 본문

### I. 조영제를 이용하는 검사의 준비

1. 정맥 내 조영제 주사의 준비
2. 조영제의 가온
3. 금식
4. 조영제 사용 설명 및 환자 동의 획득
5. 조영제 사용 시 감염관리

### II. 조영제의 혈관 외 유출

1. 혈관 외 유출의 위험인자
2. 혈관 외 유출의 감소 대책
3. 혈관 외 유출의 치료

### III. 요오드화 조영제의 유해반응

1. 요오드화 조영제에 대한 급성 유해반응
2. 요오드화 조영제에 대한 지연성 유해반응
3. 요오드화 조영제 과민반응의 치료와 전 처치
4. 신장 유해반응
5. 그 외 독성

### IV. 가돌리늄 조영제의 유해반응

1. 가돌리늄 조영제에 의한 유해반응
2. 가돌리늄 조영제 과민반응의 치료와 전 처치
3. 신원성전신섬유증
4. 가돌리늄 조영제의 신장 유해반응
5. 기타 유해반응

### V. 특수상황에서의 조영제 사용

1. 임신
2. 수유
3. 소아
4. 약물 상호작용
5. 임상검사 상호작용

### VI. 부록

1. 참고문헌
2. 조영제 사용에 대한 설명문 및 동의서
3. 동의서
4. 검사 전 확인사항
5. 자발적 조영제 부작용 보고

## 요약문

### I. 조영제를 이용하는 검사의 준비

#### 1. 정맥 내 조영제 주사의 준비

성인 기준으로 20-gauge 혹은 그보다 큰 크기의 캐놀라를 사용하며, 팔오금부의 정맥(antecubital vein)이나 아래팔(forearm)의 큰 정맥에 거치하도록 한다.

#### 2. 조영제의 가온

요오드화 조영제를 사용하는 경우 조영제 가온(37°C)을 하도록 권고한다.

#### 3. 금식

CT 또는 MRI 조영제를 사용하는 검사 전 흡인성 폐렴을 예방하기 위해 금식이 필요하다는 증거는 없다.  
고형식이나 유동식(우유 포함) 이외의 물과 같은 맑은 액체류(clear fluid)는 제한하지 않고 섭취하는 것을 권고한다.  
복부 검사의 경우, 적절한 영상을 얻기 위해 음식 제한이 필요한 경우 각 검사 종류에 따라 금식을 시행한다.

#### 4. 조영제 사용 설명 및 환자 동의 획득

이전 조영제에 대한 유해반응 과거력, 천식과 약물 알레르기를 포함한 알레르기 질환의 과거력, 현재 신기능 및 신장질환 과거력, 메트포르민을 포함한 현재 복용 중인 약제 등의 정보를 확인해야 한다.

#### 5. 조영제 사용 시 감염관리

CT 또는 MRI 조영제를 사용하는 검사 시 사용되는 자동주입기용 주사기(injector syringe) 및 연결선은 일회용으로 사용하며 매 환자마다 교체하는 것을 원칙으로 한다.  
조영제 사용 시 다른 주사제 사용과 마찬가지로 무균을 유지해야 한다.

### II. 조영제의 혈관 외 유출

#### 1. 혈관 외 유출의 위험인자

기술적 요인은 전통식 주입기를 사용하는 것, 하지만 말단정맥과 같이 좋지 않은 부위에 주사가 위치하는 것, 고장성 조영제를 사용하거나 다량의 조영제를 사용하는 것 등이다  
환자 요인은 선천적 또는 질병과 연관되어 혈관이 약한 경우(예, 항암치료 중인 환자), 혈관이 손상된 경우, 의사소통이 불가능한 경우(예, 영아나 소아), 동맥 허혈증이 있는 경우, 림프 또는 정맥의 순환이 원활하지 않은 경우 등이다.

#### 2. 혈관 외 유출의 감소 대책

요오드화 조영제를 사용하기 전 가온한다.  
테스트로 생리식염수를 주입해 본다.  
조영제 주입 초기에 주사부위를 관찰하고, 혈관 외 유출이 의심되면 즉시 주입을 중단한다.

### 3. 혈관 외 유출의 치료

냉/온 찜질을 통한 보존적 치료를 시행한다.  
 냉찜질은 급성기에 통증과 염증반응을 줄이고, 온찜질은 유출된 조영제가 순환계로 빠르게 제거될 수 있도록 한다.  
 다량의 조영제 유출이 발생할 경우 바늘 등을 이용하여 피부에 여러 개의 바늘구멍을 만들어 조영제를 짜내거나, 보존적인 치료와 더불어 히알루론산분해 효소(hyaluronidase)의 사용을 고려할 수 있으나 이의 효과가 확실히 입증된 것은 아니다.  
 중증의 손상이 의심될 경우 관련 전문의의 조언을 구한다.

## III. 요오드화 조영제의 유해반응

### 1. 요오드화 조영제에 대한 급성 유해반응

#### 1) 급성 유해반응의 분류

|     | 과민반응                                                                                                | 생리적 반응(기타 유해반응)                                                                         |
|-----|-----------------------------------------------------------------------------------------------------|-----------------------------------------------------------------------------------------|
| 경증  | 국소적인 두드러기·가려움증<br>국소적인 피부 부종<br>목(인후두) 가려움<br>코 충혈, 재채기, 콧물, 결막염                                    | 경미한 메스꺼움·구토<br>일시적인 화끈거림·열감·오한<br>두통, 어지러움, 불안, 맛의 변화<br>경증 고혈압<br>저절로 호전되는 혈관미주신경항진 반응 |
| 중등증 | 광범위한 두드러기·가려움증<br>광범위한 홍반<br>안면부종<br>목이 붓거나 심<br>저산소증이 없는 천명, 기도수축                                  | 지속되는 메스꺼움·구토<br>홍통<br>고혈압성 긴급증(hypertensive urgency)<br>치료가 필요한 혈관미주신경항진 반응             |
| 중증  | 호흡곤란을 동반한 심한 부종과 안면부종<br>저혈압을 동반한 심한 홍반<br>그렁거림/저산소증을 동반한 후두부종<br>심한 저산소증이 있는 천명, 기도수축<br>아나필락시스 쇼크 | 부정맥<br>경련<br>고혈압성 응급증(hypertensive emergency)<br>치료에 반응하지 않는 혈관미주신경항진 반응                |

고혈압성 긴급증: 수축기 혈압 180 mm Hg 이상 또는 이완기 혈압 110 mm Hg 이상이며 장기 손상 소견은 없을 경우  
 고혈압성 응급증: 혈압 상승(> 180/120 mm Hg)과 표적장기손상이 진행되는 경우(고혈압으로 인한 뇌졸중, 의식저하, 기억력 저하, 협심증 또는 심장발작, 눈 및 신장 손상, 대동맥 파열, 폐부종, 경련 등)

| 저혈압 발생 시 아나필락시스와 혈관미주신경반사의 감별진단 |      |                                                                                                                 |                                                                             |
|---------------------------------|------|-----------------------------------------------------------------------------------------------------------------|-----------------------------------------------------------------------------|
|                                 |      | 아나필락시스                                                                                                          | 혈관미주신경반사                                                                    |
| 발생 시간                           |      | 주입 즉시 또는 주입 도중에 발생할 수 있으나, 대부분 조영제 주입 후 15분 이내에 발생한 경우 6-8시간 후에 지연성 쇼크 반응이 다시 나타날 수 있음                          | 대부분 조영제 주입 즉시 또는 주입 도중에 발생                                                  |
| 증상/<br>징후                       | 피부   | 피부가 가렵거나 전반적으로 붉게 변하며 두드러기/혈관부종이 동반됨. 그러나 드물게 피부 증상이 전혀 없는 경우도 있음                                               | 피부가 전반적으로 창백하고 차가우며 때로는 식은땀을 동반함                                            |
|                                 | 호흡기  | 호흡곤란이 동반될 수 있으며 호흡수가 빨라짐. 천식 또는 후두부종이 동반될 수 있음                                                                  | 대부분 호흡은 정상이거나 호흡수가 약간 느려짐                                                   |
|                                 | 심혈관계 | 맥박이 빨라지고 사지 말단 동맥 및 경동맥 모두 맥박이 약하게 느껴짐. 쇼크 체위를 취해도 저절로 혈압이 높아지지 않음. 하지만 맥박이 정상인 경우도 있고 드물게 느려지는 경우도 있으므로 주의를 요함 | 맥박이 느리고 사지 말단에서는 맥박이 약하게 느껴지나 경동맥에서는 세게 느껴짐. 쇼크 체위를 취하면 저절로 혈압이 높아지는 경우도 있음 |
|                                 | 신경계  | 불안감이 동반되며 의식을 잃을 수 있음. 쇼크 체위를 하더라도 의식이 저절로 돌아오지 않음                                                              | 어지럽고 쓰러질 것 같은 느낌이 있고 일시적으로 의식을 소실하는 경우도 있으나, 쇼크 체위만으로 대부분 의식이 저절로 회복됨       |

## 2) 위험인자

조영제 과민반응의 과거력: 가장 중요한 위험인자로 과거력이 있는 환자는 전 처치를 하더라도 약 10%에서 재발하는 것으로 알려졌다.  
 천식 등 알레르기 질환: 특히 조절되지 않은 천식환자에서 요오드화 조영제 투여 후 기도수축이 흔하게 발생한다.  
 심각한 심혈관계 질환 환자에서는 혈액학적 변화가 더 흔하다.

## 2. 지연성 유해반응

지연성 유해반응은 일반적으로 경증인 경우가 많다. 대부분은 과민반응으로 나타난다.  
 그중 피부발진(70%)이 가장 흔한 증상으로 다른 약물유해반응에서 나타나는 피부병변들이 모두 가능하지만, 반구진성 발진(maculopapular rash)이 가장 흔하다. 지연성 과민반응에 대한 전 처치는 확립되지 않았다.  
 전 처치가 필요하다고 판단 시 알레르기 전문의 등에게 의뢰한다.

## 3. 요오드화 조영제 과민반응의 치료와 전 처치

### 1) 급성 반응 예방을 위한 조치

(1) 중증의 과민반응이 있었던 환자에서는 요오드화 조영제를 사용하지 않는 대체 검사를 우선적으로 고려한다.  
 (2) 요오드화 조영제를 사용할 예정인 모든 환자에게 일괄적으로 선별검사 목적의 피부시험을 시행하는 것은 권고하지 않는다.  
 (3) 중증 과민반응 발생을 예측하기 위하여 사전에 소량의 요오드화 조영제를 주사하여 반응이 유발되는지 관찰하는 것은 권고되지 않는다.  
 (4) 조영제 과민반응의 과거력이 있는 환자에서 조영제를 변경할 경우 조영제 과민반응의 재발률을 낮출 수 있음이 알려져 있다. 이전에 중증 이상의 요오드화 조영제에 대한 과민반응을 경험한 환자에서는 안전한 조영제를 선택하기 위한 피부 시험을 가능하다면 시행할 것을 권고한다.  
 (5) 검사 전 전 처치 약물 사용  
 검사 기관의 상황 등을 고려하여 조영제 과민반응의 위험성이 높은 환자에서 스테로이드제 및 항히스타민제를 이용한 전 처치를 고려해 볼 수 있다. 전 처치 약물의 사용은 각 센터의 원내 프로토콜을 따르거나 알레르기 전문의 등의 자문을 받은 후에 시행한다.  
 (6) 검사 후 관찰  
 조영제에 의한 심한 과민반응은 대부분 투약 30분 이내에 발생하는 것으로 알려져 있으므로 조영제를 이용한 검사 후 일정 시간 동안 조영제 과민반응이 발생하는지 관찰해야 한다.

**\*전 처치 Protocol의 예시(ACR, ESUR 지침)**  
 <예정된 검사에 대한 전 처치>  
 - 프레드니솔론 50 mg (검사 13, 7, 1시간 전) 경구투여 + 1시간 전 항히스타민제 투여(경구, 주사 모두 가능(예: 클로르페니라민 4 mg 주사))  
 - 메칠프레드니솔론 32 mg (검사 12, 2시간 전) 경구투여 ± 항히스타민제 사용(1시간 전)  
 \*경구 투여가 불가능한 경우 hydrocortisone 200 mg 정맥주사로 대체할 수 있음.

<응급 상황에서의 전 처치>  
 - 메칠프레드니솔론 40 mg (또는 히드로코르티손 200 mg) 정맥주사 (조영제 주입 전까지 매 4시간 마다) + 클로르페니라민 4 mg 정주(검사 1시간 전)

## 2) 급성 유해반응의 치료

| 급성 유해반응 종류 | 치료                                                                                                                                                                                                                                                                                                                                                                                                    |
|------------|-------------------------------------------------------------------------------------------------------------------------------------------------------------------------------------------------------------------------------------------------------------------------------------------------------------------------------------------------------------------------------------------------------|
| 구역/구토      | 경과관찰, 필요시 항구토제 고려                                                                                                                                                                                                                                                                                                                                                                                     |
| 두드러기/발적    | 경증: 경과관찰, 필요시 항히스타민제<br>중등증-중증: 활력징후 감시, 정맥주사 경로 확보, 항히스타민제, 필요시 전신 스테로이드제 사용                                                                                                                                                                                                                                                                                                                         |
| 안면 또는 후두부종 | 기도 확보<br>산소포화도 유지(성인 90% 이상, 소아 95% 이상)<br>활력징후 감시<br>항히스타민제, 필요시 전신 스테로이드제 사용<br>심한 안면부종 혹은 급성 후두부종: 에피네프린 0.01 mg/kg 근주, 5-15분마다 반복<br>(최대 용량: 성인 0.5 mg, 6-12세 0.3 mg, 6세 미만 0.15 mg)                                                                                                                                                                                                              |
| 기관지수축      | 기도를 확보하고, 활력징후와 산소포화도를 감시하며(성인 90% 이상, 소아 95% 이상), 저산소증일 경우 산소를 공급<br>속효성 기관지 확장제(salbutamol) 흡입: 정량식 흡입기 혹은 연무기<br>항히스타민제, 필요시 전신 스테로이드제 사용<br>계속 진행 시: 에피네프린 0.01 mg/kg 근주, 5-15분마다 반복<br>(최대 용량: 성인 0.5 mg, 6-12세 0.3 mg, 6세 미만 0.15 mg)                                                                                                                                                           |
| 아나필락시스 쇼크  | 기도 확보<br>산소포화도 유지(성인 90% 이상, 소아 95% 이상)<br>활력징후 감시<br>쇼크체위<br>정맥주사 경로 확보<br>빠른 속도의 수액 정주<br>계속 진행 시 1:1000 에피네프린 0.01 mg/kg 근주, 5-15분마다 반복(최대 용량: 성인 0.5 mg, 6-12세 0.3 mg, 6세 미만 0.15 mg).<br>근주 투여에도 반응이 없을 경우 1:10000 에피네프린을 서서히 정맥으로 투여해 볼 수 있음. <sup>a</sup><br>2차 치료: 항히스타민제, 전신 스테로이드제, 속효성 기관지 확장제(salbutamol) 등                                                                               |
| 발작 또는 경련   | 주변 정리<br>기도를 확보하고, 활력징후와 산소포화도를 감시하며(성인 90% 이상, 소아 95% 이상), 저산소증일 경우 산소를 공급<br>정맥주사 경로 확보<br>디아제팜 5 mg, 미다졸람 0.5-1 mg, 로라제팜 2-4 mg 서서히 정주<br>가능하면 신경 전문의 자문 요청                                                                                                                                                                                                                                        |
| 폐부종        | 기도를 확보하고, 활력징후와 산소포화도를 감시하며(성인 90% 이상, 소아 95% 이상), 저산소증일 경우 산소를 공급<br>이뇨제(푸로세마이드 20-40 mg)를 2분에 걸쳐 정주                                                                                                                                                                                                                                                                                                 |
| 혈관미주신경반사   | 기도를 확보하고, 활력징후와 산소포화도를 감시하며(성인 90% 이상, 소아 9% 이상), 저산소증일 경우 산소를 공급<br>쇼크체위<br>정맥주사 경로 확보<br>빠른 속도의 수액 정주<br>필요시 아트로핀(0.5 mg/mL) 0.5-1 mg을 천천히 정주(3-5분 간격으로 반복 투여, 최대 누적 투여량 3 mg)                                                                                                                                                                                                                      |
| 고혈압성 위기    | 관련 장기 이상 소견(의식저하, 흉통, 빈호흡, 오심/구토, 어지러움, 시야 혼미 등) 확인<br>기도를 확보하고, 활력징후와 산소포화도를 감시하며(성인 90% 이상, 소아 95% 이상), 저산소증일 경우 산소를 공급<br>정맥주사 경로 확보<br>라베탈롤 20 mg 정주(2분에 걸쳐 천천히) → 10분마다 반응 확인, 목표 혈압이 될 때까지 2배씩 증량(최대 80 mg) → 초기 부하 용량<br>투여 후 지속 정주 (1-2 mg/min으로 시작하여 증감량)<br>(정맥로가 없거나 정맥용 항고혈압제가 없으면 니트로글리세린 0.4 mg 설하 투여 → 5-10분 후 반응 확인, 필요시 재투여)<br>고혈압성 폐부종 의심될 때: 이뇨제(푸로세마이드 20-40 mg) 정주 (2분에 걸쳐 천천히) |

<sup>a</sup>1:1000 에피네프린을 1 mL를 생리식염수 혹은 포도당 9 mL로 희석한 후 천천히 정맥 투여

## 4. 신장 유해반응

### 1) 검사 전 신기능 측정

위험인자가 없는 외래 환자들에게서 반드시 신기능을 확인해야 할 필요는 없음

- 다음과 같은 위험인자가 있는 경우 확인을 권고함.

기존 eGFR이 60 mL/min/1.73 m<sup>2</sup> 미만인 경우, 신장 수술 과거력, 알부민뇨, 고혈압, 고요산혈증, 메트포르민 사용력 또는 당뇨 병력이 있는 환자

<예정된 요오드화 조영제의 사용 시>

급성 콩팥손상 환자, 만성콩팥병의 급성 악화가 의심되는 경우 또는 입원해서 조영제를 투여하는 경우: 조영제 투여 전 7일 이내를 신기능 검사시점으로 추천함.

그 외: 조영제 투여 전 3-6개월 내 신기능 검사 수치를 활용

<응급으로 요오드화 조영제의 사용 시>

신기능 검사 결과가 나올 때까지 연기가 가능한지 확인하고 불가능하다면 기저 신기능 장애(eGFR < 45 mL/min/1.73 m<sup>2</sup>이면서 동맥주입으로 인한 첫 번째 통과<sup>+</sup>로 신장에 노출된 경우이거나 eGFR < 30 mL/min/1.73 m<sup>2</sup>이면서 정맥주입된 경우)로 간주하고 검사를 진행함.

### 2) 신독성 위험인자

환자 요인:

기저 신기능 장애\*

- 동맥주입으로 인한 첫 번째 통과<sup>+</sup>로 신장에 노출된 경우나 중환자실 환자인 경우에는 eGFR < 45 mL/min/1.73 m<sup>2</sup>

- 정맥 투입으로 인한 두 번째 통과<sup>+</sup>로 신장에 노출된 경우에는 eGFR < 30 mL/min/1.73 m<sup>2</sup>

- 급성 콩팥손상

시술 관련 요인:

1. 동맥주입으로 조영제가 첫 번째 통과로 신장에 노출된 경우

2. 다량의 조영제가 첫 번째 통과로 신장에 노출되었을 경우

3. 고삼투압 조영제 와 48-72시간 이내에 조영제를 여러 번 주입한 경우

\*당뇨, 탈수, 심혈관질환, 이노제 사용, 고령, 고혈압, 고요산혈증 등이 동반되면 조영제 유발 급성 콩팥손상 위험이 높아질 수 있으나 명확한 근거는 부족함

<sup>+</sup>조영제가 희석되지 않은 형태로 신장동맥에 도달하는 경우(예: 좌측 심장, 흉부대동맥, 신동맥 상부 대동맥, 신장동맥에 주사)

<sup>+</sup>조영제가 희석된 형태로 신장동맥에 도달하는 경우(예: 우측 심장, 폐동맥, 경동맥, 쇄골하동맥, 관상동맥에 주사)

급성 콩팥손상

\*특히 다음의 질환이 동반된 경우 신독성 발생의 위험이 높아질 수 있음

: 당뇨병콩팥병, 탈수, 울혈성 심부전, 24시간 이내의 심근경색, 대동맥 내풍선펌프(intra-aortic balloon pump), 빈혈, 이노제 및 신독성 약물 사용, 70세 이상 노인, 다발골수종, 고요산혈증

조영제 요인:

다량의 조영제 사용

24시간 이내 반복적 조영제 노출

고삼투성 조영제 사용

### 3) 신독성 예방

요오드화 조영제를 투여하기 전 환자 개별화된 위험-이득 평가를 고려하는 것을 권고함.

조영제를 사용하지 않거나(예: 비조영증강 컴퓨터단층촬영[CT]) 기타 방식(예: 초음파, 비조영제 자기공명영상[MRI])을 사용하는 것은 조영제 유발 신장손상의 고위험군에게 유용한 대체 방법이 될 수 있음.

급성 콩팥손상 또는 eGFR 30 mL/min/1.73 m<sup>2</sup> 미만인 중증 만성콩팥병이 있는 환자에게 수액요법을 권고하나 수액 주입 전 체적 팽창(예: 심부전 또는 기타 과혈량 상태)의 위험을 고려해야 함.

eGFR 30 mL/min/1.73 m<sup>2</sup> 이상인 만성콩팥병 또는 무뇨의 투석 환자의 경우 예방이 필요하지 않음. 임상적 재량에 따라 eGFR 30-44 mL/min/1.73 m<sup>2</sup>인 환자에서 고위험 상황(예: 다양한 위험 요인, 최근 급성 콩팥손상, 경계선 eGFR)에 대해 개별적으로 수액 사용을 고려할 수도 있음.

(예시) 0.9% 생리식염수를 요오드화 조영제 노출 전 3-4시간, 노출 후 4-6시간 동안 1 mL/kg/h으로 수액공급

#### 4) 메트포르민(Metformin)을 복용 중인 환자의 조영제 사용

|                                                                                                |                                                                                                                                                                     |
|------------------------------------------------------------------------------------------------|---------------------------------------------------------------------------------------------------------------------------------------------------------------------|
| 급성 콩팥손상이 없고 eGFR 30 mL/min/1.73 m <sup>2</sup> 이상                                              | 메트포르민을 중단할 필요가 없으며 조영제 사용 후 환자의 신장을 재평가할 필요 없음<br>단, eGFR이 30-44 mL/min/1.73 m <sup>2</sup> 에는 임상적 재량에 따라 고위험 상황(콩팥손상의 위험 요인, 최근 급성 콩팥손상 병력 등)에 대해 메트포르민 중단을 고려 가능함 |
| 급성 콩팥손상 또는 중증 만성콩팥병(eGFR 30 mL/min/1.73 m <sup>2</sup> 미만)이 있거나 신장동맥에 색전을 유발할 수 있는 동맥 카테터 시술 시 | 요오드화 조영제 사용 전과 사용 후 48시간 동안 메트포르민을 중단하고 신기능을 재평가하여 CA-AKI 발생하지 않은 것으로 확인한 후 메트포르민을 다시 투여함                                                                           |

### 5. 그 외 독성

#### 1) 갑상선 관련 유해반응

그레이브스병(Grave's disease), 다결절성 갑상선종(multinodular goiter)이나 갑상선 자율증(thyroid autonomy)과 같은 위험인자를 가지는 환자에서 요오드화 조영제를 사용할 때에는 갑상선 기능항진증의 발생에 대해 주의를 기울이는 것이 좋다. 그러나 우리나라와 같이 식이 요오드를 충분히 섭취하는 지역에서는 요오드화 조영제에 의한 갑상선 항진증의 발병률이 낮다.

## IV. 가돌리늄 조영제의 유해반응

### 1. 가돌리늄 조영제에 의한 유해반응

가돌리늄 조영제 유해반응의 빈도는 정맥주사용 요오드화 조영제보다 발생 빈도가 적고 대부분은 경증 반응으로 저절로 호전된다. 이전에 주사용 요오드화 조영제에 알레르기 반응을 보인 경우 조영제 간에 교차 반응성을 보이는 것이 아님에도 불구하고 약물 알레르기의 범주에 속하기 때문에 급성 유해반응이 나타날 가능성이 상대적으로 높을 수 있다.

### 2. 가돌리늄 조영제 과민반응의 치료와 예방을 위한 조치

요오드화 조영제 과민반응의 치료와 예방 조치에 준하여 시행한다.

### 3. 신원성전신성염증

#### 1) 위험인자

##### 환자요인

- 4, 5기 만성신부전이 있는 환자(사구체 여과율 < 30 mL/min/1.73 m<sup>2</sup>)
- 투석을 받고 있는 환자
- 급성 콩팥손상 환자
- 임신부 및 신생아

##### 조영제 요인

- 고위험군 조영제:
  - Gadopentetate dimeglumine (Magnevist®)
  - Gadodiamide (Omniscan®)
  - Gadoversetamide (Optimark®)



## 2) 신원성전신섬유증 예방 조치

다음과 같은 환자에서는 고위험군 조영제는 사용 금지이다.  
4, 5기의 만성신부전(사구체 여과율 < 30 mL/min)이나 투석 중인 환자  
급성 콩팥손상 환자  
임산부 및 신생아

## V. 특수상황에서의 조영제 사용

### 1. 임신

|                             |                                                                                                                       |
|-----------------------------|-----------------------------------------------------------------------------------------------------------------------|
| 요오드화 조영제                    | X-선을 이용한 영상검사가 꼭 필요한 경우, 요오드화 조영제를 임신 한 여성에게 사용할 수 있다.<br>임신 중 산모에게 조영제를 준 경우 출산 첫 주 이내에 신생아 갑상선 기능 확인이 필요하다.         |
| 가돌리늄 조영제                    | 임산부에게 조영증강 MRI가 반드시 필요한 경우, 고위험군 조영제의 사용은 금지이며, 중등도 내지는 저위험군 조영제를 가능한 최소한의 용량으로 사용한다.<br>출산 후 신생아에 대한 추가적인 검사는 필요 없다. |
| 조영제 부작용의 과거력이 있는 임산부에서 전 처치 | 조영제 부작용의 과거력이 있는 임산부에서 조영제를 이용한 검사가 필요한 경우 일반적인 전 처치가 가능하며, 해당 분야 전문가에게 자문을 구한다.                                      |

### 2. 수유

|          |                                                                                              |
|----------|----------------------------------------------------------------------------------------------|
| 요오드화 조영제 | 요오드화 조영제를 투여받은 산모는 정상적인 모유수유가 가능하다.                                                          |
| 가돌리늄 조영제 | 고위험군 가돌리늄 조영제를 투여받았을 시 24시간 동안 모유수유 중단하도록 하지만, 중등도 혹은 저위험군 조영제를 사용한 경우 반드시 모유수유를 중단할 필요는 없다. |

### 3. 임상검사 상호작용

|                |                                                                                                             |
|----------------|-------------------------------------------------------------------------------------------------------------|
| 갑상선            | 요오드화 조영제 투여를 받은 후 2달 동안은 갑상선 동위원소 스캔 검사는 피해야 한다.<br>방사성 요오드 치료 예정 환자는 치료 전 최소 1-2달 동안은 요오드화 조영제 사용을 피해야 한다. |
| 뼈, 적혈구 동위원소 스캔 | <sup>99m</sup> Tc 동위원소를 사용하는 뼈 스캔, 적혈구 스캔 검사는 요오드화 조영제 사용 후 최소 24시간 뒤에 시행하도록 한다.                            |

## 본문

기존의 2011년 ‘주사용 요오드화 조영제 유해반응에 관한 한국 임상진료지침’과 2012년 ‘자기공명영상용 가돌리늄 조영제 유해반응에 관한 한국 임상진료지침’을 통합하고 2014년 Contrast Media Safety Issues and ESUR Guidelines과 2016년 ACR Manual on Contrast Media Version 10.2의 개정된 내용을 참조하였으며 각 분야의 전문가 자문을 구하였다.

이와는 별도로 임상현장에서 접할 수 있는 주요한 상황에 대하여 PICO 체계에 근거한 핵심질문을 정하였고 영상의학과와 알레르기내과가 각각 이에 대한 체계적 문헌 검색을 하였다. 이를 통해 각 핵심질문에 대하여 근거요약, 권고 고려사항 및 권고문구 초안을 마련하였다. 영상의학과 7인과 알레르기 내과 8인을 포함한 전문가 15인이 참석한 토론회에서 초안의 각 권고문구에 대하여 타당성 등을 토의하였고 현장에서 각 문구에 대한 동의 정도를 평가하기 위한 설문 시행하였다. 설문은 1-9점 척도에 각 전문가가 권고문구 초안에 동의하는 정도에 따라 1점은 전혀 동의하지 않음, 9점은 매우 동의함(1-3 점: 동의하지 않음, 4-6점: 모름, 7-9점: 동의함)으로 투표하였다. 각 범주에 2/3 이상이 투표하면 권고하는 것에 합의하는 것으로 간주하였고, 전문가의 의견과 투표 결과에 따라 권고문구 초안을 수정하였다.

## 주요 임상질문

- ① 조영제를 사용하는 검사 전 금식이 필요한가?
- ② 급성 유해 반응을 줄이기 위해 조영제 가온이 필요한가?
- ③ 유해 반응을 경험하였던 환자에서 다시 주사용 요오드화 조영제를 사용할 때 조영제를 교체하여야 하는가?
- ④ 조영제가 혈관 외로 유출되었을 때 처치는?
- ⑤ 조영제 과민반응의 고위험군에서 조영제 사용 전 전 처치를 하는 것이 전 처치 없이 조영제 사용하는 것에 비해 조영제 과민반응을 줄이는가?
- ⑥ 중증 조영제 과민반응이 있었던 환자에게 스테로이드제 전 처치를 하는 것이 과민반응의 재발을 줄일 수 있는가?
- ⑦ 이전 CT용 요오드화 조영제에 과민반응이 있었던 경우, 내시경적 역행성 담췌관 조영술, 담관조영술 등 혈관 외로 요오드화 조영제에 노출될 때 과민반응의 발생률이 높은가?
- ⑧ 요오드화 조영제 이용 CT 검사 예정인 모든 환자에게 과민반응을 예측하기 위한 피부시험(skin test)을 시행하는 것이 과민반응의 발생률을 줄이는 데 도움이 되는가?
- ⑨ 요오드화 조영제 유해반응을 경험한 환자에서 피부시험 결과로 조영제를 선택하는 것이 요오드화 조영제 유해반응의 재발을 감소시키는가?
- ⑩ 이전에 요오드화 조영제를 사용한 이후 지연성 과민반응이 있었던 환자에서 약물을 이용한 전 처치를 하는 것이 하지 않는 것에 비하여 지연성 과민반응의 재발을 줄이는가?

주요 임상질문에 대하여 마련한 권고문은 전체 통합된 조영제 유해반응에 관한 임상진료지침 내의 해당하는 부분에 추가하여 기술하였다.

통합된 임상진료지침은 내부 검토를 거쳐 초안을 작성하고 한국의약품안전관리원 지역의약품안전센터장 중 개정위원이 아닌 센터장으로 구성된 검토위원의 외부검토를 거쳐 최종안을 확정하였다.

## 개정위원

### 영상의학과

|     |           |
|-----|-----------|
| 최치훈 | 충북대학교병원   |
| 오세원 | 은평성모병원    |
| 황재연 | 양산부산대학교병원 |
| 용환석 | 고려의대 구로병원 |
| 최영훈 | 서울대학교병원   |
| 차민재 | 중앙대학교병원   |

### 알레르기내과

|     |           |
|-----|-----------|
| 김태범 | 서울아산병원    |
| 이지향 | 서울아산병원    |
| 김세훈 | 분당서울대학교병원 |
| 이재현 | 세브란스병원    |
| 허규영 | 고려의대 구로병원 |
| 박소영 | 중앙대학교병원   |

### 신장내과

|     |           |
|-----|-----------|
| 김세중 | 분당서울대학교병원 |
| 김효상 | 서울아산병원    |
| 류지영 | 분당서울대학교병원 |

### 문헌검색

|     |           |
|-----|-----------|
| 최미영 | 한국보건의료연구원 |
|-----|-----------|

## I. 조영제를 이용하는 검사의 준비

조영제란 영상 검사를 할 때 조직의 대조도(contrast)를 높임으로써 병변을 명확하게 구별해내 데 도움을 주는 의약품으로 정확한 영상진단 혹은 영상유도 하 시술을 위해서 필수적으로 사용되는 경우가 많다. 단순 X선 촬영 및 전산화단층촬영(computed tomography; 이하 CT)에는 요오드화(iodinated) 조영제 및 바륨(barium) 조영제가 사용되고 있으며 자기공명영상(magnetic resonance imaging; 이하 MRI)에서는 가돌리늄(gadolinium) 조영제가 사용되고 있는데 검사 방법에 따라 조영제를 사용하여 얻을 수 있는 이익과 환자에게 발생할 수 있는 위험성을 고려하여 조영제 사용 여부를 결정해야 한다. 본 진료 지침에서는 CT 및 MRI에서 높은 빈도로 사용되고 있는 요오드화 조영제 및 가돌리늄 조영제에 대해 기술하겠다.

### 1. 정맥 내 조영제 주사의 준비

정맥 내 조영제는 전동식 주입기(power injector)를 사용하여 플라스틱 삽입관을 통해 주입해야 한다. 플라스틱 삽입관은 가능하다면 성인 기준으로 20 gauge 혹은 그보다 큰 크기의 삽입관을 사용하며, 팔오금부의 정맥(antecubital vein)이나 아래팔(forearm)의 큰 정맥에 거치한다.

### 2. 조영제의 가온

요오드화 조영제는 온도가 높아질수록 점도가 낮아진다. 가온을 통해 점도가 낮아진 조영제를 사용하였을 때 조영제의 주입 압력이 감소하고 카테터를 통과하는 유속이 빨라지는 것이 관찰되었다. 이러한 변화는 고삼투성 제제(high-osmolar agent)에서 먼저 보고되었으나 최근의 연구에서는 저삼투성 제제(low-osmolar agent)와 등삼투성 제제(iso-osmolar agent)에서도 조영제 주입 압력이 감소하여 작은 직경의 카테터를 사용하여도 적절한 주입속도를 얻을 수 있음을 증명하였다. 온도에 따른 점도 변화는 저삼투성 제제(low-osmolar agent)보다 등삼투성 제제(iso-osmolar agent)에서 더 뚜렷하게 관찰되었다.

가온을 통해 점도가 낮아진 조영제를 이용하였을 때 여러 가지 임상적인 장점이 있음이 알려져 있다. 조영제 가온과 급성 유해반응에 대해 가장 먼저 발표된 연구에서는 실온(20°C)의 조영제와 가온(37°C)된 조영제 간에 급성 유해반응의 빈도 차이가 없었으나, 이후 발표된 연구들에서는 가온된 조영제를 사용하였을 경우 급성 유해반응이 감소되는 것이 보고되었다. 특히 고삼투성 제제를 사용하는 경우 조영제의 혈관 외 누출을 감소시키는 효과를 보였다. 심장의 전기생리학적, 혈액학적 측면에서도 가온된 조영제가 장점이 있을 가능성이 동물 실험을 통해 보고되었는데, 가온된 조영제를 이용하여 개에서 관상동맥 조영술을 시행하였을 때 실온의 조영제를 사용하였을 경우에 비하여 심장의 전기생리학적 변화와 혈액학적 변화가 적은 것을 관찰하였다. 또한 가온된 조영제를 대량주사(bolus injection)하였을 때 혈관 내의 최고 조영증강 값이 더 높았고, 최고 조영증강에 이르는 시간이 감소하여 더 적절한 CT 혈관조영 영상을 얻을 수 있었다. 2014년 발간된 조영제의 안전성에 대한 ESUR 가이드라인에서는 조영제 가온이 급성 유해 반응을 줄일 가능성이 있으며 경험적으로 환자들이 가온된 조영제에 대하여 더 편안한 반응을 보이므로 조영제 가온을 추천하였고, 2015년 발간된 ACR 매뉴얼에서는 점도가 높은 조영제를 주입하는 경우, 조영제를 고속으로 주입하는 경우, 작은 내경을 가진 카테터를 사용하는 경우 조영제 가온을 추천하였고, 그 외의 경우에도 조영제 가온의 장점이 있을 수 있다고 언급하였다. 가돌리늄 조영제의 경우는 실온 보관 및 사용이 원칙이다.

결론적으로 요오드화 조영제는 37°C로 가온하였을 때 점도가 낮아져 주입 시 혈액학적으로 유리하고 급성 유해반응을 감소시키고 더 적절한 조영증강 영상을 얻을 가능성이 있다. 대규모 연구에 의한 근거는 부족하나 조영제 가온에 의한 위해성이 보고된 바 없으며 많은 비용과 노력이 요구되지 않는 것을 고려할 때 요오드화 조영제의 사용 전 가온을 권고한다.

### 3. 금식

국내 많은 병원에서 CT 또는 MRI 조영제에 의한 오심, 구토 및 이에 동반된 흡인성 폐렴의 예방을 목적으로 조영증강 검사 전 금식을 시행하고 있다. 조영제의 발전과 함께 오심, 구토 등 부작용의 비율은 현저하게 감소하였으나 조영증강 검사 전 금식은 경험적으로 지속되어왔다. 이러한 관행적인 금식지침은 전신마취하에 시행하는 수술 전 금식에 대한 권고에 일부 근거를 두고 있다. 최근 개정된 전신마취하 수술 전 금식 지침에서는 물과 같은 맑은 액체류(clear fluid)는 2시간, 수유는 4시간, 이유식 및 우유는 6시간, 고형식은 6시간의 금식을 권고하고 있으나, 마취를 하지 않거나 국소마취하에 시행하는 시술에서는 적용하지 않고 있다. 이러한 관행적 검사 전 금식은 환자에게 불편감을 줄 뿐 아니라 소아 환자나 고령 환자에서 저혈당의 가능성, 조영제 관련 신독성의 위험성을 높이는 등의 부작용을 일으킬 여지가 있으며 응급 상황에서 중요한 진단의 지연을 초래할 수 있다. 따라서 이에 대한 이해 및 위험-이득에 대한 재고가 필요하다. 조영증강 CT 시행 전 금식 시행 여부와 흡인성 폐렴을 포함한 합병증 발생률의 관계에 대해서는 아직 대규모 연구를 통한 조사가 많지 않은 실정이다. 하지만 Wagner 등은 1000명의 환자 군을 대상으로 무작위 시험(randomized trial)을 시행하였는데, 조영제 주입 전 4시간 이상의 금식을 시행한 군과 금식을 하지 않은 군을 비교하였을 때 합병증 발생에 유의한 차이는 없었고, 유의한 차이는 아니었으나 금식을 시행한 군에서 오히려 오심 관련 증상의 발생이 많았다(0.4% vs. 0%). Oowaki 등도 금식을 시행한 군에서 조영증강 CT 이후 오심 및 구토의 발생이 더 많음을 보고한 바 있다. 한편, 여러 목적으로 검사 전 물이나 경구 조영제와 같은 액체류를 마시고 시행한 3537예의 조영증강 CT 또는 MRI 검사에서 흡인성 폐렴에 대한 보고는 없었다. 또한 신기능 보호를 목적으로 관상동맥시술 및 조영술 전 경구수분섭취를 한 1008명의 결과에서도 오심, 구토 등에 의한 합병증은 없었다. Sutherland 등은 3시간 이상의 금식은 위 내용물의 감소에 영향이 없으며 오히려 위 내용물의 pH를 낮춰 흡인성 폐렴의 위험성을 높인다고 보고한 바 있다. Lee 등이 조사한 한국, 미국, 프랑스, 독일, 호주, 이집트 6개국 69개 병원의 금식 프로토콜(protocol)을 보면 병원 별로 조영증강 CT 전 금식 시간에 차이가 크며, 특히 프랑스와 독일의 병원 중 2/3에서는 액체류는 물론 고형식도 제한하지 않고 있다.

결론적으로 CT 또는 MRI 조영제를 사용하는 검사 전, 흡인성 폐렴의 예방을 위한 금식이 필요하다는 확실한 근거는 없다. 기존의 문헌들을 고려해 볼 때 물과 같은 맑은 액체류는 검사 직전까지 경구 섭취해도 안전한 검사가 가능하다. 고형식의 경우 역시 근거는 부족하나 긴 위 배출 시간에 따른 흡인성 폐렴의 위험을 고려할 때 환자에게 큰 불편을 주지 않는 범위 내에서 위험과 이득을 고려하여 금식 시간을 정해야 한다.

### 4. 조영제 사용 설명 및 환자 동의 획득

조영제를 이용한 영상검사를 하기 전에 검사자는 조영제 부작용에 대해 환자에게 충분히 설명하고 동의를 받아야 한다. 환자 설명문 및 동의서의 예시는 부록에 수록하였다.

또한 검사자는 조영제 유해반응을 줄이기 위하여 이전 조영제에 대한 유해반응 과거력, 천식과 약물 알레르기를 포함한 알레르기 질환의 과거력, 현재 신기능 및 신장질환 과거력, 메트포르민을 포함한 현재 복용 중인 약제 등의 정보를 확인해야 한다. 자세한 ‘검사 전 확인사항’은 부록에 수록하였다.

### 5. 조영제 사용 시 감염관리

CT나 MRI에 사용되는 조영제는 고압주사기에 충전되어 연결줄을 통해 환자에게 투여되는데 여타 정맥 주사제와 마찬가지로 주사과정에서 무균이 유지되지 않을 경우 주위 환경으로부터 감염이 일어날 가능성이 있다. 따라서 주사과정에서 무균 규칙을 공식 절차화하고 이 절차에 대한 의료진 교육 및 평가를 강화할 필요가 있다.

또한 2016년 일회용 주사기 재사용으로 인한 C형 간염의 전파가 문제가 되면서 보건복지부가 일회용 주사기 재사용 시 처벌을 강화한 의료법 개정과 관련된 의료법 시행규칙이 개정되었다. 개정된 의료법 제4조 6항에 따르면 의료인은 일회용 주사 의료용품(한 번 사용할 목적으로 제작되거나 한 번의 의료행위에서 한 환자에게 사용하여야 하는 의료용품으로서 사람의 신체에 의약품, 혈액, 지방 등을 투여, 채취하기 위하여 사용하는 주사침, 주사기, 수액용기와 연결줄 등을 포함하는 수액세트 및 그밖에 이에 준하는 의료품을 말한다)을 한 번 사용한 후 다시 사용하여서는 아니 된다고 명시되었는데 이는 CT나 MRI 조영제 투여에서도 동일하게 적용된다고 할 수 있다. 따라서 CT 및 MRI 촬영에 사용하는 오토인젝터에 연결되는 주사기와 연결줄도 일회용으로 사용하여 매 환자마다 교체하는 것을 원칙으로 하고 있다.

이러한 주사기와 연결줄의 일회 사용이 물자 낭비와 환경 오염 같은 사회적 문제는 물론 검사 시간 증가에 따른 효율성 감소를 일으킬 수 있다는 지적이 있어 환자 쪽 연결선에 두 개의 체크밸브를 갖는 역류방지 필터를 설치하고 이러한 필터는 매 환자마다 교환하되 나머지 주사기와 연결줄은 허가된 시간(12시간 혹은 24시간) 동안 교체 없이 사용하는 방안이 대안으로 제기되고 있으며 대한영상의학회는 이에 대해 보건복지부와 의견을 논의 중이다.

## II. 조영제의 혈관 외 유출

조영제 혈관 외 유출 빈도는 보고자에 따라 다양한데, 요오드화 조영제의 경우 약 0.13%~0.94%의 빈도로 발생한다고 알려져 있다. 조영제가 혈관 밖으로 유출되었을 때 가장 많이 나타나는 증상은 통증이며, 부종과 국소 발적을 보일 수 있지만 대개 심각하지 않으며 보통 24시간 내, 길게는 4일 내 회복된다. 드물게 피부 궤양이나 연조직 괴사가 생기며, 구획증후군이 나타날 수 있다. 이러한 중증 손상은 주로 대량의 조영제 유출 이후에 발생한다. 가돌리늄 조영제의 경우, 동물 실험에서 모두 같은 부피의 요오드화 조영제에 비해 피부와 피하조직에 미치는 독성이 낮다고 보고되었다. 또한 요오드화 조영제에 비해 일반적으로 적은 부피의 조영제를 사용하므로 유출 시 구획증후군이 발생할 가능성이 더 낮다. 이러한 이유로 가돌리늄 조영제의 혈관 외 유출로 인해 심각한 손상이 발생하는 경우는 요오드화 조영제에 비해 더 드물다.

### 1. 혈관 외 유출의 위험인자

혈관 외 유출의 위험인자는 크게 기술적 요인과 환자 요인으로 나눌 수 있다. 기술적 요인으로는 전동식 주입기를 사용하는 것, 하지만 말단정맥과 같이 좋지 않은 부위에 주사가 위치하는 것 그리고 고장성 조영제를 사용하거나 다량의 조영제를 사용하는 것을 들 수 있다. 환자 요인으로는 선천적 또는 질병과 연관되어 혈관이 약한 경우(예, 항암치료 중인 환자), 혈관이 손상된 경우, 의사소통이 불가능한 경우(예, 영아나 소아), 동맥 허혈증이 있는 경우, 림프 또는 정맥의 순환이 원활하지 않은 경우 등이 있다.

### 2. 혈관 외 유출의 감소 대책

혈관 외 유출을 감소시키기 위해서는 정맥시술을 할 때 적당한 크기의 삽입관을 적절한 정맥에 정교하게 삽입하고 비이온성 요오드화 조영제를 사용하고 조영제를 주입하기 전에 생리식염수로 테스트 주입을 해보는 것이 도움이 될 수 있다. 조영제 주입 초기에 주사부위를 관찰하여 혈관 외 유출이 의심될 때는 즉시 주입을 중단하는 등의 대책이 필요하다.

### 3. 혈관 외 유출의 치료

조영제가 혈관 외로 유출된 부위에 대한 보존적인 치료로 충분하나, 그 치료 방법에 대한 명확한 합의는 없는 실정이다. 냉온 찜질의 효과를 비롯하여, 바늘 또는 카테터를 이용한 유출된 조영제의 흡인이나 히알루론산분해효소(hyaluronidase) 주입은 효용성에 대한 논란이 있다. 2015년 출간된 ACR의 조영제 진료지침에 따르면, 조영제가 유출된 부위에 냉찜질과 온찜질 중 어떤 것이 더 좋다는 분명한 증거가 없다고 되어 있으며, 실제 진료 과정에서도 냉찜질과 온찜질이 특별한 기준 없이 혼용되고 있다. 냉찜질은 혈관을 수축시켜 유출 부위의 통증과 염증반응을 줄이고, 조영제가 확산되는 것을 막는다. 온찜질의 경우 유출된 조영제의 점도는 낮추고, 혈관을 확장시켜 조영제가 순환계로 빠르게 제거될 수 있도록 하기 때문에, 건강한 성인에서 온찜질을 했을 때, 유출된 액체의 양이 감소되었다. 하지만 조영제의 경우 냉찜질이 더 효과적이라는 실험결과도 있다. 혈관 외로 유출된 조영제를 바늘이나 카테터를 통해 흡인하면 유출된 약제가 손상시키는 조직의 크기를 줄일 수 있다. Tsai 등은 단순히 조영제를 바늘을 통해 흡인하는 것이 아니라, 조영제를 주입한 카테터를 제거한 후 카테터가 들어갔던 주변으로 18 gauge 바늘로 5-8개의 구멍을 내고, 그 구멍으로 조영제가 나올 수 있도록 짜냈더니 치료를 받은 여덟 명의 환자가 증상이 호전되었으며, 중증의 부작용이 발생하지 않았다고 보고했다. 히알루론산분해효소는 세포 사이의 결합을 분열시켜 결합조직 내의 장막을 파괴함으로써, 유출된 약물이 쉽게 확산되고 림프계나 말초혈관을 통해 제거되도록 도와 항암제를 비롯한 여러 약물(calcium chloride, hyperalimentation solution)이 혈관 외로 유출되었을 때 조직의 괴사를 줄여주는 효과가 있는 것으로 알려져 있다. 그러나 조영제 유출에 대한 히알루론산분해효소의 효과에 관해서는 상반된 연구결과도

있다. 따라서 혈관 외로 유출된 조영제의 양이 상대적으로 많을 때, 보존적 치료에 더해 추가적으로 유출 부위에 히알루론산 분해효소 주입을 고려해 볼 수 있겠으나 이의 효과가 확실히 입증되어 있지 않다. 논문들에 따르면 조영제가 혈관 외로 유출된 후 1시간 이내에 15-250 U의 히알루론산분해효소를 1.5-6 mL의 식염수에 희석하여 사용하였다. 중증의 손상이 의심될 경우(괴양, 수포, 이상감각, 4시간 이상 지속되는 통증, 혈액 순환 감소)에는 관련 전문의의 조언을 구해야 한다.



### III. 요오드화 조영제의 유해반응

요오드화 조영제에 노출된 환자에서 발생하는 유해반응의 임상양상은 매우 다양하다. 따라서 유해반응이 의심되는 경우 계통적으로 다양한 임상양상을 의심하고 확인하여야 한다(Table 1). 일반적으로 유해반응의 발생 시간에 따라 1시간 이내에 나타나는 급성 반응과 그 이후에 나타나는 지연성 반응으로 분류할 수 있다. 생명을 위협하는 유해반응은 대부분 20분 이내에 발생한다.

Table 1. 요오드화 조영제 유해반응의 계통별 임상양상

| 계통  | 증상                                        | 계통   | 증상                               |
|-----|-------------------------------------------|------|----------------------------------|
| 피부  | 열감<br>가려움증<br>부종<br>두드러기<br>혈관 외 유출<br>통증 | 중추신경 | 두통<br>어지러움<br>경련<br>의식저하<br>시력저하 |
| 위장관 | 메스꺼움<br>구토<br>설사<br>복통                    | 호흡기  | 후두부종<br>기도수축<br>폐부종              |
| 심혈관 | 저혈압<br>부정맥<br>급성 심부전                      | 신장   | 핍뇨<br>고혈압<br>신기능 저하              |
| 내분비 | 갑상선항진증 악화<br>췌장염<br>부신성 고혈압               |      |                                  |

#### 1. 요오드화 조영제에 대한 급성 유해반응

급성 유해반응은 매우 다양한 임상양상으로 나타난다. 발생기전에 따라 과민반응과 생리적 반응으로 분류할 수 있으며 중증도에 따라 경증, 중등증, 중증반응으로 분류할 수 있다. 유해반응의 기전과 중증도 분류는 향후 환자의 위험도를 평가하고 대처방안을 세우는 데에 필수적이므로 가급적 객관적이고 정확하게 이루어져야 한다.

Table 2. 요오드화 조영제 급성 유해반응의 분류

|     | 과민반응                                                                                                | 생리적 반응(기타 유해반응)                                                                         |
|-----|-----------------------------------------------------------------------------------------------------|-----------------------------------------------------------------------------------------|
| 경증  | 국소적인 두드러기·가려움증<br>국소적인 피부 부종<br>목(인후두) 가려움<br>코 충혈, 재채기, 콧물, 결막염                                    | 경미한 메스꺼움·구토<br>일시적인 화끈거림·열감·오한<br>두통, 어지러움, 불안, 맛의 변화<br>경증 고혈압<br>저절로 호전되는 혈관미주신경항진 반응 |
| 중등증 | 광범위한 두드러기·가려움증<br>광범위한 홍반<br>안면부종<br>목이 붓거나 심<br>저산소증이 없는 천명, 기도수축                                  | 지속되는 메스꺼움·구토<br>홍통<br>고혈압성 긴급증(hypertensive urgency)<br>치료가 필요한 혈관미주신경항진 반응             |
| 중증  | 호흡곤란을 동반한 심한 부종과 안면부종<br>저혈압을 동반한 심한 홍반<br>그림거림/저산소증을 동반한 후두부종<br>심한 저산소증이 있는 천명, 기도수축<br>아나필락시스 쇼크 | 부정맥<br>경련<br>고혈압성 응급증(hypertensive emergency)<br>치료를 반응하지 않는 혈관미주신경항진 반응                |

고혈압성 긴급증: 수축기 혈압 180 mm Hg 이상 또는 이완기 혈압 110 mm Hg 이상이며 장기 손상 소견은 없을 경우

고혈압성 응급증: 혈압 상승(> 180/120 mm Hg)과 표적장기손상이 진행되는 경우(고혈압으로 인한 뇌졸중, 의식저하, 기억력 저하, 협심증 또는 심장발작, 눈 및 신장 손상, 대동맥 파열, 폐부종, 경련 등)

1) 생리적 반응

생리적 반응은 요오드화 조영제의 직접적인 화학독성과 삼투압 차이에 의하여 발생하는데, 고용량서 발생 빈도가 높으므로 주의가 필요하다. 혈관미주신경반응은 미주신경항진에 의한 저혈압과 서맥으로 흔히 나타나는데 불안이나 말초혈관 카테터 삽입 등의 자극으로도 유발이 된다. 대부분의 경우 저절로 호전이 되지만 간혹 중증으로 발현하기도 하므로 완전히 호전될 때까지 세심한 관찰이 필요하다.

| 저혈압 발생 시 아나필락시스와 혈관미주신경반사의 감별진단 |                                                                                        |                                                                                                                 |                                                                             |
|---------------------------------|----------------------------------------------------------------------------------------|-----------------------------------------------------------------------------------------------------------------|-----------------------------------------------------------------------------|
|                                 | 아나필락시스                                                                                 | 혈관미주신경반사                                                                                                        |                                                                             |
| 발생 시간                           | 주입 즉시 또는 주입 도중에 발생할 수 있으나, 대부분 조영제 주입 후 15분 이내에 발생한 경우 6-8시간 후에 지연성 쇼크 반응이 다시 나타날 수 있음 | 대부분 조영제 주입 즉시 또는 주입 도중에 발생                                                                                      |                                                                             |
| 증상/징후                           | 피부                                                                                     | 피부가 가렵거나 전반적으로 붉게 변하며 두드러기/혈관부종이 동반됨. 그러나 드물게 피부 증상이 전혀 없는 경우도 있음                                               | 피부가 전반적으로 창백하고 차가우며 때로는 식은땀을 동반함                                            |
|                                 | 호흡기                                                                                    | 호흡곤란이 동반될 수 있으며 호흡수가 빨라짐. 천식 또는 후두 부종이 동반될 수 있음                                                                 | 대부분 호흡은 정상이거나 호흡수가 약간 느려짐                                                   |
|                                 | 심혈관계                                                                                   | 맥박이 빨라지고 사지 말단 동맥 및 경동맥 모두 맥박이 약하게 느껴짐. 쇼크 체위를 취해도 저절로 혈압이 높아지지 않음. 하지만 맥박이 정상인 경우도 있고 드물게 느려지는 경우도 있으므로 주의를 요함 | 맥박이 느리고 사지 말단에서는 맥박이 약하게 느껴지나 경동맥에서는 세게 느껴짐. 쇼크 체위를 취하면 저절로 혈압이 높아지는 경우도 있음 |
|                                 | 신경계                                                                                    | 불안감이 동반되며 의식을 잃을 수 있음. 쇼크 체위를 하더라도 의식이 저절로 돌아오지 않음                                                              | 어지럽고 쓰러질 것 같은 느낌이 있고 일시적으로 의식을 소실하는 경우도 있으나, 쇼크 체위만으로 대부분 의식이 저절로 회복됨       |

2) 과민반응

과민반응은 용량에 관계없이 발생하며 예측이 어려운 반응으로 면역학적 기전이 관여하는 알레르기 반응과 기전이 확인되지 않은 비알레르기성 과민반응으로 분류할 수 있다. 요오드화 조영제에 의해서 과민반응이 발생하는 기전은 잘 알려져

있지 않는데 요오드화 조영제가 알레르기 반응을 통해서 과민반응을 일으킨다는 설도 있고 호염기구와 비만세포를 직접 자극하여 과민반응을 일으킨다는 설도 있다.

### 3) 중증도

급성 유해반응은 다양한 증상으로 나타나며 중증도도 다양하다. 일반적으로 중증도는 세 단계로 분류하는데 저절로 호전되는 경증, 경증보다 심하여 치료를 필요로 할 정도인 중등증, 생명을 위협하거나 영구적인 장애, 사망을 초래하는 중증으로 분류한다(Table 2).

### 4) 빈도

급성 유해반응의 빈도를 정확하게 파악하기는 쉽지 않다. 조사방법, 유해반응 기준과 평가방법 등이 연구자에 따라 서로 다르며 유해반응이 발생하더라도 보고가 되지 않는 경우가 흔하기 때문이다. 과거 고삼투성 조영제를 사용할 때에 급성 유해반응은 5%~15% 정도의 높은 빈도를 보였으나 저삼투성 조영제를 사용하면서 급성 유해반응의 빈도와 중증도가 낮아졌다. 최근 국내외 보고에서는 급성 유해반응의 발생 빈도가 2% 미만으로 알려졌다. 조영제에 의한 급성 유해반응 사망에 대한 메타분석에서 저장성 조영제에 인한 사망은 10만 회당 0.9회로 보고되었다.

### 5) 위험인자

대부분의 경우 발생을 예측하기 어렵지만 일부 위험 인자들이 보고되어 있다.

#### (1) 조영제 과민반응의 과거력

조영제 과민반응의 과거력은 조영제 과민반응의 가장 중요한 위험인자이다. 조영제 과민반응의 과거력이 있는 환자에서 향후 과민반응이 발생할 가능성은 약 10%~35%로 알려졌으며 과거력이 있는 환자에서 전 처치를 하더라도 약 10%에서 발생하는 것으로 알려졌다.

#### (2) 동반 질환

천식 등 알레르기 질환이 있는 환자에서 조영제 과민반응의 발생 위험이 높다. 특히 조절되지 않은 천식 환자에서 요오드화 조영제 투여 후 기도수축이 흔하게 발생한다. 대동맥 협착이나 중증 심부전 등의 심각한 심혈관계 질환 환자에서는 혈액학적 변화가 더 흔하다.

#### (3) 약물

후향적 연구에서 베타차단제를 사용하는 경우 중등증 또는 중증 유해반응의 발생 위험이 높다고 보고되었다. 그러나 전향적 연구에서 확인되지 않아, 단순히 기저질환에 의한 영향일 가능성도 배제할 수 없다.

#### (4) 조영제 유형

이온성 고삼투성 조영제의 유해반응 빈도는 최근에 널리 사용되는 비이온성 저삼투성 조영제에 비하여 약 4-5배 높다.

### 6) 고위험군 확인을 위한 검사

아직까지 과민반응과 생리적 반응 모두에서 발생을 예측하기 위한 검사는 권고되지 않는다.

## (1) 피부시험

요오드화 조영제를 사용할 예정인 모든 환자에게 일괄적으로 선별검사 목적의 피부시험을 시행하는 것이 과민반응 발생률을 줄이는데 도움이 되는가를 판정하기 위한 연구는 부족하다. 해당 주제에 대한 체계적 고찰은 찾을 수 없으며 전향적 연구도 드물게 시행되었다. 2011년도 이후 선별검사로 피부시험의 유용성에 대한 3개의 전향적 연구(prospective study)가 있었다. 국내 한 전향적 연구에서 피부시험의 음성예측도가 99%, 양성예측도는 0%로 확인되었다. 현재까지 피부시험이 도움이 된다는 근거가 부족하기 때문에 최근 개정된 ACR이나 ESUR 지침에서도 선별검사 목적의 피부시험은 권고되지 않고 있다. 따라서 요오드화 조영제 이용 CT 검사 예정인 모든 환자를 대상으로 피부시험을 시행하는 것은 권고하지 않는다.

요오드화 조영제에 대한 과민반응의 병력이 있는 환자에서 과민반응의 원인 약물을 확인하거나 요오드화 조영제에 대한 재노출이 필요할 때 안전한 조영제를 선택하기 위해서 피부시험을 시행하는 경우가 있다. 과민반응의 원인 약물을 확인하려는 목적의 조영제 피부시험의 양성률에 대해서는 2015년 메타분석이 발표된 바 있는데 전체적인 양성률은 즉시형 반응에서 16.8%, 지연성 반응에서 25.7%였다. 하지만 중증 즉시형 반응이 있었던 환자에서는 51.9%의 양성률을 보여 중증 과민반응의 병력이 있었던 환자에서는 피부시험이 유용할 가능성을 보여주었다. 이후의 여러 연구에서 조영제 중등증-중증 과민반응을 경험한 환자에게 과민반응을 보인 조영제로 피부시험을 시행하였을 때 양성률은 메타분석 결과에서 52 % (95 % CI, 31%–72%)로 확인되었다. 또한 조영제 피부시험의 음성 예측도는 메타 분석 결과 93 % (95 % CI, 86%–96%)로 높기 때문에 피부시험 음성으로 확인된 조영제로 교체하는 것이 안전하다. 이러한 결과들은 조영제 피부시험이 중등증-중증 과민반응을 보인 환자에서 안전한 조영제를 선택하는데 유용할 수 있다는 근거가 될 수 있다. 국내 한 다기관 연구결과에서 과민반응을 유발한 조영제로 피부시험을 시행한 후 피부시험 양성으로 확인된 경우에는 선택 가능한 다른 종류의 조영제로 피부시험을 추가로 시행하였고, 추가 피부시험에서 음성으로 확인된 조영제를 투여하였다. 또한 과민반응을 유발한 조영제로 피부시험을 한 결과 음성으로 확인되면 조영제 종류만 변경하였다. 그 결과 총 269명 중 84.8% (228명)에서 조영제 과민반응이 발생하지 않았고, 과민반응이 재발생한 환자 41명에서도 중등증-중증 과민반응 비율이 63.4% (26명)에서 26.8% (11명)로 감소하였다. 이는 과거 조영제 급성 과민반응을 경험한 환자에서 조영제 재투여가 필요한 경우, 피부시험을 기반으로 한 대체 조영제 선택이 과민반응의 재발과 중증도를 감소시킬 수 있음을 제시하는 결과이다.

조영제 피부시험은 우선 희석하지 않은 조영제 원액으로 피부단자시험을 시행하고, 음성으로 확인된 경우 1:10으로 희석하여 피내 시험을 시행한다.

조영제를 교체할 때 안전한 조영제를 선택하기 위해 시행하는 피부반응시험의 과민반응 예방효과에 대한 메타 분석 결과에서 피부반응시험 음성인 조영제를 재 노출하였을 때 즉시형 반응은 7.1%, 지연성 반응은 34.5%에서 재발하였다. 이상의 결과를 보았을 때 조영제 피부반응시험의 유용성을 뒷받침할 만한 근거는 아직 부족하다. 다만 이전에 중증 이상의 요오드화 조영제에 대한 과민반응을 경험한 환자에서는 안전한 조영제를 선택하기 위해 피부반응시험을 고려해 볼 수는 있겠다.

## (2) 시험 주사

중증 과민반응 발생을 예측하기 위하여 사전에 소량의 요오드화 조영제를 주사하여 반응이 유발되는지 관찰하는 것은 권고되지 않는다. 시험 주사에서 반응이 없더라도 통상 용량 투여 시 과민반응이 발생할 수 있고 전체적으로 발생 빈도를 줄이지도 못하기 때문이다.

## 2. 요오드화 조영제에 대한 지연성 유해반응

조영제 노출 1시간 이후에 발생하는 유해반응으로 길게는 일주일 후에 발생하는 경우도 있다. 대부분이 3시간에서 48시간 이내에 발생한다. 급성 유해반응과 같이 발생기전에 따라 과민반응과 생리적 반응으로 분류한다.

### 1) 빈도

지연성 반응 중 과민반응은 약 0.5%~14%에서 나타나는 것으로 보고되었다. 일반적으로 요오드화 조영제 노출 후 반응이 늦게 나타나므로 조영제와 연관성을 의심하지 않아 보고 빈도가 낮다.

### 2) 임상양상

지연성 반응의 대부분은 과민반응으로 나타난다. 그중 피부발진(70%)이 가장 흔한 증상으로 다른 약물유해반응에서 나타나는 피부병변들이 모두 가능하지만, 반구진성 발진(maculopapular rash)이 가장 흔하다. 일부에서는 전신성 홍반성 농포증으로 나타나기도 하며 스티븐슨-존슨증후군 또는 독성 표피 괴사 용해(toxic epidermal necrolysis)와 같은 양상의 발현도 보고되었다. 생리적 반응으로 메스꺼움, 구토, 발열, 어지러움, 두통 등의 증상을 호소하는 경우도 있다.

### 3) 예방과 예측

현재까지 조영제의 지연성 과민반응의 예방과 관련된 보고는 증례보고의 수준에 그치고 있다. 최근 EUSR의 조영제 안전 위원회에서 시행한 문헌검색 결과를 보았을 때에도 지연성 과민반응의 약물을 이용한 예방에 대해서는 전신 스테로이드제 전 처치를 한 몇 가지 증례를 제시하는 수준에서 그치고 있는데 증례 중에는 예방효과가 있었던 경우도 있고 그렇지 않았던 경우도 있었다. 예방효과에 있어 가장 많이 인용되는 보고는 Romano 등의 보고인데 이 증례에서는 사이클로스포린(cyclosporin)과 메칠프레드니솔론(methylprednisolone)의 두 가지 약제를 이용하여 지연성 과민반응을 효과적으로 예방하였다고 보고하였다. 2015년에 출판된 ACR 지침에는 조영제에 의한 지연성 과민반응에 대한 전 처치로 항히스타민제나 전신 스테로이드제를 이용하는 것의 예방효과를 잘 알 수 없어 경증의 지연성 과민반응의 병력만으로 전 처치를 할 필요는 없다고 하였다. 2014년 ESUR 지침에서는 과거력이 있거나 과거에 심한 약물 알레르기가 있었던 사람 혹은 IL-2를 사용하고 있는 사람에게는 지연성 과민반응에 대한 교육을 하라고 권고하고 있다. 다만 전신 스테로이드제를 이용한 전 처치는 권고하지 않으며 대신 첩포시험이나 피내시험 지연판독을 통해 반응이 없는 조영제를 확인하여 사용하도록 권고하고 있다. 현재까지의 근거만으로는 지연성 과민반응을 예방하기 위하여 약물을 이용하여 전 처치를 하는 것에 대해서는 결론을 내릴 수 없다. 조영제에 의한 지연성 피부반응의 기전은 잘 알려져 있지 않으나 T세포에 의한 과민반응일 가능성이 높을 것으로 생각하기 때문에 전신 스테로이드제나 사이클로스포린을 이용하여 T세포 기능을 억제하는 것이 지연성 과민반응의 예방에 도움이 될 가능성은 있다. 단, 전신 스테로이드제를 사용하는 중에도 독성 표피 괴사 용해를 예방하지 못하였다는 보고도 있기 때문에 스티븐슨-존슨 증후군이나 독성 표피 괴사 용해, DRESS 증후군과 같은 치명적인 지연성 반응이 일어났던 경우 조영제를 이용한 검사는 하지 않도록 권고한다.

### 4) 위험인자

조영제 과민반응의 과거력, IL-2 치료(특히 마지막 IL-2 투여 4주 이내), 비이온성 이합체(nonionic dimer, iodixanol) 조영제가 지연성 과민반응의 위험인자로 작용한다.

## 3. 요오드화 조영제 과민반응의 치료와 전 처치

### 1) 급성 유해반응의 치료

조영제에 의한 급성 반응 중 조영제 특성에 의한 생리적인 반응은 정맥 내 고삼투성 조영제의 사용이 감소하면서 줄어들

있다. 또한 생리적 반응은 발생하더라도 대부분 별다른 조치 없이 좋아지기 때문에 증상이 생긴 경우 경과 관찰만으로 충분한 경우가 많다. 혈압저하를 동반하는 미주신경성 실신의 경우에도 수분 내에 별다른 조치 없이 회복되지만, 갑자기 일어나면 다시 증상이 유발될 수 있으니 15-30분 정도 누워서 안정을 취하게 한다. 대부분의 과민반응 역시 별다른 조치 없이 호전되지만 치명적인 부작용으로 진행할 수 있기 때문에 과민반응이 발생하였을 때에도 일정 시간 이상 환자를 관찰할 필요가 있다. 기도폐쇄나 혈압저하를 시사하는 증상이 있을 때에는 기도확보, 산소 공급을 통한 산소포화도 유지(성인 90% 이상, 소아 95% 이상), 활력징후(혈압, 맥박수, 호흡수, 체온) 감시, 정맥주사 경로 확보 등 일반적인 응급상황에 대한 처치를 시행한다.

#### (1) 구역/구토

일시적인 경우가 대부분이라 경과 관찰만으로 충분하다. 증상이 심하고, 지속되는 경우 적절한 항구토제(예, metoclopramide) 사용을 고려해 볼 수 있다.

#### (2) 두드러기, 발적

경증(국소/일시적)인 경우, 대부분의 경우 자연적으로 소실되므로 치료가 필요하지 않다. 두드러기, 발적으로 인해 불편감을 느낄 경우, 항히스타민제(예, chlorpheniramine) 투여를 고려해 볼 수 있다. 중등증(여러 군데 퍼져 있고 증상이 지속) 혹은 중증(전신에 광범위하게 퍼져 있고 증상이 점차 악화)인 경우에는 항히스타민제와 함께 전신 스테로이드제(예, hydrocortisone 등) 사용을 고려할 수 있으며 아나필락시스 발생 여부를 감시해야 한다.

#### (3) 안면 또는 후두부종

증상의 조절을 위해 항히스타민제와 필요시 전신 스테로이드제를 사용한다. 심한 안면부종 혹은 급성 후두부종이 발생하여 기도폐쇄로 진행될 것이 예상되는 경우 아래 기술한 아나필락시스성 쇼크에 준하여 에피네프린을 투약한다. 후두부종이 치료에 즉각적으로 반응하지 않고 지속될 경우 응급상황 프로토콜에 따라 처치한다.

#### (4) 기관지수축

우선 기도를 확보하고 산소포화도를 90% 이상(소아 95% 이상)으로 유지한다.

정량식 흡입기(metered dose inhaler)나 연무기(nebulizer)를 이용하여 속효성 기관지 확장제(salbutamol)를 흡입한다. 필요시 반복 흡입한다. 속효성 기관지 확장제 투여에도 불구하고 기관지수축이 진행되는 경우 앞에 기술한 후두부종에 준하여 에피네프린을 사용해 볼 수 있고 항히스타민제와 전신 스테로이드제를 사용할 수 있다. 치료에 반응하지 않는 중증 기관지수축 환자 또는 산소포화도가 지속적으로 88% 미만인 경우 응급상황 프로토콜에 따라 처치한다.

#### (5) 아나필락시스성 쇼크

기도를 확보하고 산소포화도를 유지시킨다. 쇼크 체위(다리를 상체보다 높이 유지)를 취하고 혈압 등 신체징후를 감시한다. 다량의 생리식염수나 하트만용액을 빠른 속도로 정주한다(성인: 1 L 신속 주입). 1:1000 (1 mg/mL) 에피네프린 0.01 mg/kg (최대 용량: 성인 0.5 mg, 6-12세 소아 0.3 mg, 6세 미만 소아 0.15 mg)을 허벅지 전외측 중간부분에 근주하고, 필요시 5-15분마다 반복 투여해 볼 수 있다. 대부분의 경우 1-2회 투약으로 회복되지만, 드물게 3회 이상 투여가 필요한 경우도 있다. 근주 투여에도 반응이 없을 경우 1:10000 에피네프린(1:1000 에피네프린을 1 mL를 생리식염수 혹은 포도당 9 mL로 희석)을 서서히 정맥으로 투여해 볼 수 있다. 2차적인 치료로 항히스타민제와 전신 스테로이드제를 정주한다. 기관지수축이 동반된 경우 앞에 서술한 바와 같이 속효성 기관지 확장제(salbutamol)를 흡입한다. 치료에 반응하지 않는 경우 응급상황 프로토콜에 따라 처치한다.

#### (6) 발작 또는 경련

주변을 정리하여 환자가 다치지 않도록 하고, 기도로 흡인을 막기 위해 고개를 옆으로 돌려주고, 필요시 구강 흡인을 시행

한다. 기도를 확보하고, 활력징후와 산소포화도를 감시하며(성인 90% 이상, 소아 95% 이상), 저산소증일 경우 산소를 공급한다.

활력징후(혈압, 맥박수, 호흡수, 체온), 산소포화도(맥박산소측정기)를 감시한다. 디아제팜 5 mg 또는 미다졸람 0.5-1 mg, 로라제팜 2-4 mg을 서서히 정주한다. 가능하다면 신경 전문의에게 자문을 요청한다. 호흡저하 소견을 보이거나 산소포화도가 감소하는 경우 응급상황 프로토콜에 따라 처치한다.

#### (7) 폐부종

기도를 확보하고, 활력징후와 산소포화도를 감시하며(성인 90% 이상, 소아 95% 이상), 저산소증일 경우 산소를 공급한다. 이뇨제(푸로세마이드 20-40 mg)를 2분에 걸쳐 정주한다. 호흡곤란이 심하고 진행되는 경우 응급상황 프로토콜에 따라 처치한다.

#### (8) 혈관미주신경반사(서맥을 동반한 저혈압)

기도를 확보하고, 활력징후와 산소포화도를 감시하며(성인 90% 이상, 소아 95% 이상), 저산소증일 경우 산소를 공급한다. 쇼크 체위(다리를 상체보다 높이 유지)를 취한다. 수액 주입용 정맥주사 경로를 확보한다. 다량의 생리식염수나 하트만 용액을 빠른 속도로 정주한다(성인: 1 L 신속 주입).

이상의 처치에 반응하지 않는다면 아트로핀(0.5 mg/mL) 0.5-1 mg을 천천히 정주하며, 3-5분 간격으로 반복 투여할 수 있다. 최대 누적 투여량 3 mg을 넘지 않도록 한다. 저혈압이 지속될 경우, 응급상황 프로토콜에 따라 처치한다.

#### (9) 고혈압성 위기

고혈압(수축기 혈압 > 200 mm Hg 또는 이완기 혈압 > 120 mm Hg)과 함께 관련 장기 이상 소견(의식저하, 흉통, 빈호흡, 오심/구토, 어지러움, 시야 혼미 등)이 발생하였는지 확인한다. 기도를 확보하고, 활력징후와 산소포화도를 감시하며(성인 90% 이상, 소아 95% 이상), 저산소증일 경우 산소를 공급한다. 정맥주사 경로를 확보한다. 정맥용 라베타롤 20 mg을 2분에 걸쳐 천천히 정주하고, 10분마다 반응을 확인하여 혈압이 떨어지지 않을 경우 2배씩(최대 80 mg) 증량한다. 초기 부하 용량 투여 이후 1-2 mg/min으로 시작해 목표 혈압에 따라 증감량한다. 이와 함께 고혈압성 폐부종이 의심되는 경우 이뇨제(푸로세마이드 20-40 mg)를 2분에 걸쳐 정주한다. 정맥로를 확보할 수 없거나 정맥용 항고혈압제가 없는 경우, 니트로글리세린 정제 0.4 mg을 설하 투여하고, 5-10분 후 반응을 확인하여 재투여해 볼 수 있다.

고혈압이 지속될 경우, 응급상황 프로토콜에 따라 처치한다.

## 2) 급성 반응 예방을 위한 조치

### (1) 요오드화 조영제의 회피

중증의 과민반응이 있었던 환자에서는 요오드화 조영제를 사용하지 않는 대체 검사를 우선적으로 고려한다.

### (2) 조영제 교체

기존의 주사용 요오드화 조영제에 대한 유해반응의 과거력이 있는 경우 조영제 교체를 고려하여야 하며, 재발을 낮추기 위해 증상을 유발한 조영제는 가능하면 다시 사용하지 않는 것이 좋다. 특히 중등증-중증 유해반응의 과거력이 있는 경우에는 가능하면 피부시험을 시행하여 과민반응을 유발한 조영제에 양성이라면, 음성으로 확인된 다른 조영제를 대체 조영제로 선택하는 것이 안전하다. 피부시험에서 과민반응을 유발한 조영제에 음성인 경우나, 피부시험을 시행할 수 없는 경우에도 가능하다면 과민반응을 보였던 조영제는 제외하고 다른 조영제로 교체하여 투여하는 것이 안전하다.

실제로 조영제를 변경할 경우 조영제 유해반응의 재발률을 낮출 수 있음이 알려져 있다. 그러나 어떤 조영제를 선택해야

할지에 대한 정보는 아직 부족한 상태이며, 조영제 선택을 위해 조영제 피부시험을 시행해 볼 수 있다.

### (3) 검사 전 처치 약물 사용

조영제 과민반응의 위험인자로는 이전에 중등증/중증 조영제 급성 반응의 과거력, 천식, 약물치료를 요하는 알레르기 질환 등이 있다. 그 외에도 신부전, 약물 알레르기, 음식물 알레르기 등이 급성 조영제 과민반응을 일으키기 쉬운 선행요인이 된다는 보고도 있다. 이 중, 가장 중요한 위험인자는 이전의 조영제 과민반응 과거력이다. 조영제 과민반응의 과거력이 있는 고위험군 환자에서 조영제 사용 전 처치 약물을 사용하는 것이 사용하지 않는 것에 비해 조영제 과민반응을 줄이는가에 대해서는 아직은 연구가 매우 부족한 상태이다. 몇몇 연구가 조영제 과민반응을 예방하기 위한 전 처치 사용에 대한 근거들을 제시하고 있다. 1972년 Gates 등은 이전에 조영제 과민반응을 보인 환자 2000명에게 조영제 투여 1분 전 diphenhydramine 을 투여하였더니 예방효과가 있음을 보고하였다. 1975년 Schatz 등은 diphenhydramine 50 mg이 더 효과가 좋으며 경구 또는 주사 모두 효과가 있음을 보고하였고, Zweiman 등은 prednisolone 50 mg 3회 투여가 효과가 있음을 보고하여 이 두 가지 방법을 병합하여 현재 널리 사용되고 있는 Greenberger 전 처치법이 완성되었다. 1987년 Lasser 등이 조영제 과민반응 고위험군을 포함하여 조영제를 사용하는 모든 환자 6763명에서 경구 스테로이드제를 2회 사용하여 전 처치한 군과 1회 사용하여 전 처치한 군, 위약 대조군에서 조영제 과민반응 발생률을 비교하였다. 2회의 경구 스테로이드제로 전 처치한 환자에서 전체적으로는 위약 대조군에 비해 조영제 반응이 31% 감소하였고, 고위험군 환자에서는 37% 감소하였다. 또한 같은 연구진이 1994년에도 1155명의 환자를 대상으로 경구 스테로이드제를 6-24시간 전과 2시간 전에 전 처치한 군과 위약군을 비교했을 때, 전체 조영제에 대한 반응과 경증 반응은 통계적으로 유의하게 감소하였으나 중등증 및 중증 반응은 감소시키지 못하였다. 비록 후향적 의무기록 분석 연구이기는 하나, 국내에서도 조영제 고위험군만을 대상으로 한 연구결과가 있다. 이전에 조영제 과민반응 과거력이 있었던 30명의 환자를 대상으로 한 연구에서, 13, 7, 1시간 전에 전신 스테로이드제와 1시간 전에 항히스타민제와 H<sub>2</sub> 길항제를 사용한 후 30명 중 25명에서 조영제 과민반응이 예방되었고, 5명에서 조영제 과민반응이 다시 발생하였으며, 이전 반응이 경증인 경우 중증 반응에 비해 재발이 더 많았다(23.5% vs. 7.7%). 하지만 일반인 환자를 대상으로 한 연구에서 베타메타손(beta-methasone) 전 처치가 대조군에 비해 저혈압의 빈도를 감소시키지 못한 연구도 있었으며, 역시 일반인 대상으로 한 동맥조영술 전 처치로 디멘히드리네이트(dimenhydrinate)와 위약을 사용한 군에서 가려움증의 빈도에 차이가 없는 연구도 있었다. 또한 Katayama 등이 시행한 대규모 연구에서도 비이온성 조영제 사용 전의 스테로이드제와 항히스타민제 전 처치는 전혀 효과가 없었으며, 이는 알레르기 병력이 있는 환자에서도 마찬가지였다. 결론적으로, 아직 조영제 과민반응의 일반적인 전 처치 및 고위험군에서의 전 처치는 근거가 약하다. 하지만 일반적으로 조영제 과민반응에 의한 위험성이 전 처치 약물에 의한 위험성을 상회한다는 것을 고려했을 때 조영제 과민반응 고위험군 환자에서 조영제 사용이 불가피한 경우, 비록 근거의 수준은 낮으나 스테로이드제 및 항히스타민제 등의 전 처치 약물에 대한 부작용이나 과민반응 위험성이 높지 않다면, 스테로이드제 및 항히스타민제를 이용한 전 처치를 고려해 볼 수 있다.

#### <전 처치 약물 사용의 실제>

구역, 구토와 같은 생리적 반응에 대해서 항히스타민제나 전신 스테로이드제를 이용한 전 처치는 불필요하며, 과민반응의 경우에만 전 처치를 시행한다. 일반적으로 이전에 중등도 이상의 급성 과민반응이 있었던 경우에 전 처치가 권고된다. 조영제에 대한 경도의 과민반응 병력, 알레르기 질환, 약물에 의한 과민반응, 천식은 과민반응 발생의 고위험군으로 이들에 대해서는 임상역사의 판단에 따라 전 처치를 시행해 볼 수도 있으나, 일반적인 권고사항은 아니다. 스테로이드제와 항히스타민제의 병용 투여가 가장 효과적인 것으로 알려져 있으나, 모든 중증반응을 예방할 수는 없고, 중증반응이 급작스럽게 발생할 위험성이 있으므로 주의를 요한다(breakthrough reactions). 요오드화 조영제에 대한 급성 과민반응의 예방을 위한 전 처치 약물의 사용은 원내 프로토콜을 따르거나 알레르기 전문의 등의 자문을 받은 후에 시행한다.



외국의 지침에서 소개한 프로토콜은 다음과 같으나 검사 기관의 상황에 따라 가변적이다.

<ACR 지침>

• 예정된 검사에 대한 전 처치

① 조영제 주입 13시간, 7시간, 1시간 전 프레드니솔론 50 mg을 경구투여하고, 조영제 주입 1시간 전 클로르페니라민 4 mg 주사(근주 혹은 정주) 하거나 경구용 항히스타민제를 복용한다.

② 조영제 주입 12시간, 2시간 전 프레드니솔론 30 mg 혹은 메칠프레드니솔론 32 mg을 경구 투여하고, 항히스타민제를 추가해 볼 수 있다.

\*환자에게 경구투여가 불가능한 경우, 대신 히드로코르티손 200 mg을 정주한다.

<응급 상황에서의 전 처치>

조영제 주입 전까지 매 4시간마다 메칠프레드니솔론 40 mg 혹은 히드로코르티손 200 mg을 정맥주사를 하고, 조영제 주입 1시간 전에 클로르페니라민 4 mg 정주한다.

<ESUR 지침>

최근 ESUR 지침에서는 전 처치를 권고하지 않는다.

#### (4) 검사 후 관찰

: 일반적으로 심각한 조영제 과민반응이 생기는 시간은 투약 후 30분 이내인 경우가 많고 조영제 투여 후 과민반응까지의 시간이 짧을수록 더 심한 반응이 생길 수 있다. 따라서 조영제를 사용한 검사를 시행한 후에 어느 정도 시간 동안 조영제 과민반응이 발생하는지 관찰하는 것이 필요하다.

### 3) 지연성 유해반응

대부분 경도/중등도의 증상으로 별다른 치료 없이 호전되지만, 증상 정도에 따라 약발진에 대한 일반적인 조치를 취할 수 있다. 가려움증에 대해서는 경구 항히스타민제, 피부발진에 대해서는 스테로이드제 외용제 도포, 증상 정도가 심한 경우 경구 스테로이드제 투여를 고려해 볼 수 있다. 약물투여 기간은 증상 정도에 따라 조절한다. 피부증상 외에 발열을 보이는 경우에는 해열제, 구역감에 대해서는 진토제를 투여할 수 있다.

조영제 지연성 유해반응의 과거력이 있거나 IL-2 투약 중(특히 최근 한 달 내에 투여)인 환자에게 조영제 투여 후 후기 피부반응이 나타날 수 있음을 알리고, 유해반응이 발생한 경우 반드시 병원에 오도록 교육한다.

아직까지 전 처치의 효과가 객관적으로 입증되어 있지 않으며, 지연성 유해반응의 경우 중증 반응이 극히 드문 점을 감안할 때 경증 지연성 유해반응 환자에서 전 처치는 현재 추천되지 않는다.

그러나, 이전에 심각한 지연성 유해반응을 겪은 경우 경구 스테로이드제 예방요법을 시도해 볼 수 있다. 프레드니솔론 50 mg을 검사 당일, 이후 25 mg을 3일간 예방적으로 투여하고, 증상이 발생하면 프레드니솔론 용량을 50 mg으로 증량하여 치료를 하는 것이 제안된 바 있으나, 이 프로토콜을 적용하였을 경우 성적은 알려져 있지 않다. 지연성 과민반응에 대한 전 처치가 필요할 경우에는 알레르기 전문의 등에게 의뢰한다.

## 4. 신장 유해반응

### 1) 정의

이전에는 조영제 신독성(contrast induced nephropathy; CIN)은 조영제 유발 급성 콩팥손상(contrast-induced acute

kidney injury; 이하 CI-AKI)으로 변경되었고, 이는 요오드화 조영제의 혈관 내 투여로 인한 신장기능의 급격한 저하를 설명하는 것으로 조영제와 콩팥손상이 인과관계에 있는 경우에 사용할 수 있다. 조영제 연관 급성 콩팥손상(contrast-associated acute kidney injury; 이하 CA-AKI)은 조영제와 콩팥손상이 연관관계에 있는 경우 사용하는 용어로서, CI-AKI보다 더 넓은 의미이다. 즉, CA-AKI는 요오드화 조영제가 악화의 원인이 되었는지 여부와 관계없이도 발생할 수 있다.

## 2) 발생기전

명확한 병태생리는 밝혀지지 않았으나, 신장의 혈역학적 변화(혈관수축), 직접적인 세뇨관 독성, 삼투압 및 약제 별 화학 독성이 관여할 것이라고 추정되고 있다.

## 3) 진단

급성 콩팥손상(Acute kidney injury, AKI)은 혈관 내 요오드화 조영제 노출 후 48시간에서 72시간 이내에 다음 중 하나가 발생하면 Kidney Disease Improving Global Outcomes (KDIGO) 지침서의 기준에 따라 진단한다.

- 1) 절대 혈청 크레아티닌이 0.3 mg/dL ( $> 26.4 \mu\text{mol/L}$ ) 이상 증가하였을 경우
- 2) 혈청 크레아티닌의 백분율이 50% (기준선보다  $\geq 1.5$ 배) 이상 증가하였을 경우
- 3) 최소 6시간 동안 소변량이 0.5 mL/kg/시간 이하로 감소하였을 경우

## 4) 위험인자

환자의 요인으로 기저신기능 장애 (동맥주입으로 인한 첫 번째 통과<sup>†</sup>로 신장에 노출된 경우나 중환자실 환자인 경우에는  $\text{eGFR} < 45 \text{ mL/min/1.73 m}^2$ , 정맥투입으로 인한 두 번째 통과<sup>†</sup>로 신장에 노출된 경우에는  $\text{eGFR} < 30 \text{ mL/min/1.73 m}^2$ )와 급성 콩팥손상이 있다. 시술 관련 요인으로는 동맥주입으로 조영제가 첫 번째 통과로 신장에 노출된 경우, 다량의 조영제가 첫 번째 통과로 신장에 노출되었을 경우, 고삼투압 조영제와 48-72시간 이내에 조영제를 여러 번 주입한 경우가 있다.

조영제 투여 전에 항암제, 비스테로이드항염증제(non-steroidal anti-inflammatory drugs; 이하 NSAIDs), 항균제와 같은 신독성 약물을 보류하는 것은 근거가 부족하다. 또한 당뇨, 탈수, 심혈관질환, 이뇨제 사용, 고령, 고혈압, 고요산혈증등이 동반되면 조영제 유발 급성 콩팥손상 위험이 높아질 수 있으나 명확한 근거는 부족하다.

<sup>†</sup>조영제가 희석되지 않은 형태로 신장동맥에 도달하는 경우(예: 좌측 심장, 흉부대동맥, 신동맥 상부 대동맥, 신장동맥에 주사)

<sup>†</sup>조영제가 희석된 형태로 신장동맥에 도달하는 경우(예: 우측 심장, 폐동맥, 경동맥, 쇄골하동맥, 관상동맥에 주사)

## 5) 검사 전 신기능 측정

위험인자가 없는 외래 환자들에게서 반드시 신기능을 확인해야 할 필요는 없다. 하지만 기존  $\text{eGFR}$ 이  $60 \text{ mL/min/1.73 m}^2$  미만인 경우, 신장 수술 과거력, 알부민뇨, 고혈압, 고요산혈증, 메트포르민 사용력 또는 당뇨 병력이 있는 환자들은 요오드화 조영제 사용 전 신기능을 확인하는 것이 도움이 될 수 있다. 급성 콩팥손상환자, 만성콩팥병의 급성 악화가 의심되는 경우 또는 입원해서 조영제를 투여하는 경우에는 조영제 투여 전 7일 이내를 신기능 검사시점으로 추천한다. 그 외에는 조영제 투여 전 3-6개월 내 신기능 검사 수치를 활용할 수 있다. 응급으로 조영제를 사용해야 하는 경우에는 신기능 검사 결과가 나올 때까지 연기가 가능한지 확인하고 불가능하다면 기저 신기능 장애 ( $\text{eGFR} < 45 \text{ mL/min/1.73 m}^2$ 이면서 동맥주입으로 인한 첫 번째 통과<sup>†</sup>로 신장에 노출된 경우이거나  $\text{eGFR} < 30 \text{ mL/min/1.73 m}^2$ 이면서 정맥주입된 경우이거나 두 번째

통과\*로 신장에 노출되는 경우)로 간주하고 검사를 진행한다.

## 6) 자연 경과

기저 신기능과 위험인자 동반 여부 및 수액 공급 등에 따라 임상 경과가 다를 수 있다. 요오드화 조영제 신독성의 일반적인 경과는 조영제 투약 24시간 이내에 증상 없이 혈청 크레아티닌이 증가하기 시작하여 4일째 최고점에 이른 후 7-10일 이내 기저치로 회복된다. 영구적인 콩팥손상으로 진행되는 경우는 드물지만, 위험인자가 많거나 만성질환이 있던 환자에서는 영구적인 콩팥손상이 발생하는 경우도 있다. 신독성이 발생한 환자들은 입원율이 높고, 사망률이 높으며, 심장과 신경학적인 문제가 발생할 가능성이 높다. 하지만 현재까지의 연구들이 조영제를 사용하지 않은 대조군과의 비교를 통한 연구가 아니라 는 점에서 앞으로 더 많은 환자들을 대상으로, 조영제를 사용하지 않은 정상 대조군과의 비교 연구가 필요하며, 장기적인 추적연구결과(longitudinal outcomes)가 필요하다.

## 7) 예방

요오드화 조영제를 투여하기 전에 적절한 환자 평가 및 영상의학과 전문의와 임상 의사의 의사소통이 중요하며 개별화된 위험-이득 평가를 고려하는 것을 권고한다.

### (1) 요오드화 조영제 회피

조영제 유발 급성 콩팥손상의 발생은 급성 콩팥손상 또는 eGFR이 30 mL/min/1.73 m<sup>2</sup> 미만이고 유지 투석을 받고 있지 않은 위험 환자에서 혈관 내 요오드화 조영제 투여는 절대적인 금기 사항은 아니다. 하지만 조영제를 사용하지 않거나 (예: 비조영증강 컴퓨터단층촬영[CT]) 기타 방식(예: 초음파, 비조영증강 자기공명영상[MRI])을 사용하는 것은 조영제 유발 신장 손상의 고위험군에게 유용한 대체 방법이 될 수 있다.

심장 내 요오드 조영제에 대한 용량과 신독성관계가 정비례하는 연구는 있지만, 정맥으로 투여되는 요오드 조영제와 신독성관계를 설명하는 근거는 아직 부족하다. 따라서 조영제 유발 급성 콩팥손상의 위험을 감소시키기 위하여 조영제 용량을 감량하는 것을 추천하지 않는다. 대신, 조영제 유발 신장손상의 고위험군에 대해서는 요오드 조영제의 투여의 이점이 위험보다 더 크다고 간주되는 경우 표준 조영제 투여가 권장된다.

단기간에 반복적인 요오드화 조영제 투여는 잘 알려진 조영제 유발 신장손상의 위험인자이다. 대부분의 저삼투압 요오드화 조영제의 반감기는 약 2시간이며 신기능이 정상인 환자에서 1회 투여량의 조영제를 제거하는 데 약 20시간이 소요된다. 따라서 응급상황을 제외하고 24시간보다 짧은 투여 간격을 피하는 것이 제안되어 왔으나 이에 대한 근거는 아직 부족하다.

### (2) 요오드화 조영제의 선택

신기능이 저하된 환자에서 저삼투성 조영제를 사용하는 것이 고삼투성 조영제를 사용하는 것보다 신독성 발생이 적다고 알려져 있으나, 신기능이 정상인 사람에서는 신독성 발생의 유의한 차이가 없었다. 또한 현재까지 연구에서 등삼투성 조영제(iodixanol)와 저삼투성 조영제 간의 신독성 발생의 유의한 차이를 보인 경우는 없었다

### (3) 수액요법

조영제 유발 신장손상의 위험을 완화하기 위한 주요방법은 조영제 투여 전에 정맥 내 부피 확장을 하는 것이다. 이상적인 주입속도와 양은 알려져 있지 않지만 0.9% 생리식염수(normal saline)와 같은 등장액이 선호된다. 일반적인 방법은 검사 1시간 전에 시작하여 검사 후 3-12시간 동안 유지하는 것을 권고하며 이 시간이 증가될수록 조영제 연관 급성 콩팥손상(CA-AKI)의 위험을 낮출 수 있다고 알려져 있다. 수액의 용량은 조영제 투여 전후 고정 부피(예: 500 mL 생리식염수) 또는 중량

기반 부피(예: 0.9% 생리식염수를 요오드화 조영제 노출 전 3-4시간, 노출 후 4-6시간 동안 1 mL/kg/h으로 수액공급)를 사용한다.

탈수 상태에서는 신장으로 가는 혈류와 사구체여과율(GFR)이 감소하고 낮은 세뇨관 유량으로 인해 요오드화 조영제에 대한 세뇨관으로의 노출이 증가할 수 있다. 급성 콩팥손상 또는 eGFR 30 mL/min/1.73 m<sup>2</sup> 미만인 중증 만성콩팥병이 있는 환자에게는 예방을 권고하지만, 수액 주입 전 체적 팽창(예: 심부전 또는 기타 과혈량 상태)의 위험을 고려해야 한다. eGFR 30 mL/min 1.73 m<sup>2</sup> 이상인 만성콩팥병 또는 무뇨의 투석 환자의 경우 예방이 필요하지 않는다. 다만, 임상적 재량에 따라 eGFR 30-44 mL/min/1.73 m<sup>2</sup>인 환자에서 고위험 상황(예: 다양한 위험 요인, 최근 급성 콩팥손상, 경계선 eGFR)에 대해 개별적으로 수액 사용을 고려할 수도 있다.

#### (4) N-아세틸시스테인(N-acetylcysteine)

최근 무작위 시험에서 N-아세틸시스테인이 동맥 내 요오드화 조영제 투여에 대한 콩팥손상 예방에 있어 대조군보다 효과적이지 않았으며, 이에 정맥 내 조영제 예방에도 권장되지 않는다.

#### (5) 이뇨제(만니톨과 푸로세마이드, mannitol and furosemide)

만니톨이나 푸로세마이드는 조영제 유발 신장손상의 예방에 효과적이지 않다.

#### (6) 기타 약제

테오필린(theophylline), 엔도텔린-1 (endothelin-1) 및 페놀도팜(fenoldopam)과 같은 다른 이론적 신장 보호 약물도 강력한 뒷받침 데이터가 부족하기 때문에 권장되지 않는다.

#### (7) 투석 환자에서 요오드화 조영제의 사용

소변이 전혀 나오지 않는 말기신부전(end stage renal disease; ESRD) 환자는 이미 신장기능이 소실되었기 때문에 조영제 신독성 예방은 필요하지 않으며 추가 신장 손상 위험 없이 혈관 내 요오드화 조영제를 투여받을 수 있다. 그러나 투석 중인 펍뇨 환자는 요오드화 조영제에 노출되어 무뇨증 환자로 전환될 수 있어 급성 콩팥손상 또는 eGFR 30 mL/min/1.73 m<sup>2</sup> 미만인 환자와 같이 조영제 유발 신장손상의 고위험 환자로 취급하고 수액요법을 고려해야 한다. 단, 조영제 제거를 위해 지속적인 신대체요법시작 하거나 응급투석이 반드시 필요한 것은 아니다.

#### 8) 메트포르민(Metformin)을 복용하는 환자의 조영제 사용

메트포르민을 복용 중인 환자에서 가장 주의해야 하는 부작용은 메트포르민과 관련된 젖산산증(metformin-associated lactic acidosis)이며 매년 천 명당 0-0.084건 정도 발생하는 것으로 추정된다. 메트포르민 배설을 감소시키거나 혈중 젖산 수치를 증가시키는 모든 요인은 젖산산증을 발생시킬 수 있다. 메트포르민은 신장으로 배설되며 복용 후 24시간 이내에 흡수된 약물의 90%이 제거되기 때문에 신기능이 떨어진 상황에서 젖산산증의 위험성이 커진다. 미국 식품의약국(FDA)에서 요오드화 조영제를 사용하는 경우 메트포르민을 일시적으로 보류할 것을 권고한다. 또한, 간기능 저하, 알코올 중독, 심부전, 허혈증 및 심한 감염증은 젖산 생성을 증가시켜 메트포르민과 관련된 젖산산증을 유발할 수 있다.

메트포르민의 복용이 요오드화 조영제에 의한 신독성 위험인자가 되는 것은 아니나 급성 콩팥손상 환자와 중증 만성콩팥병(eGFR 30 mL/min/1.73 m<sup>2</sup> 미만)에서 신장 손상을 심화시킬 수 있다. 하지만 메트포르민을 복용하고 있는 환자를 적절하게 선택한 경우, 젖산산증이 보고된 바는 없고, 젖산산증이 보고된 사례는 약물에 대한 하나 이상의 환자 관련 금기 사항을 간과한 경우가 많았다.

메트포르민을 복용하는 환자를 환자의 신기능에 따라 두 가지 범주에 따라 요오드화 조영제 사용을 권고하고 있다.

### <범주 I>

급성 신손상의 증거가 없고, eGFR 30 mL/min/1.73 m<sup>2</sup> 이상인 경우 요오드화 조영제 정맥 투여 전후에 메트포르민을 중단할 필요가 없으며 조영제 사용 후 환자의 신장을 재평가 필요 없다. 다만, 임상적 재량에 따라 eGFR이 30-44 mL/min/1.73 m<sup>2</sup>인 환자에서 고위험 상황(콩팥손상의 위험 요인, 최근 급성 콩팥손상 병력 등)에 대해 메트포르민 중단을 고려할 수 있다.

### <범주 II>

급성 콩팥손상 또는 중증 만성콩팥병(eGFR 30 mL/min/1.73 m<sup>2</sup> 미만)이 있거나 신장동맥에 색전을 유발할 수 있는 동맥 카테터 시술 시, 시술 전과 시술 후 48시간 동안 메트포르민을 중단하고 신기능을 재평가하여 CA-AKI 발생하지 않은 것으로 확인한 후 메트포르민을 다시 투여한다.

## 5. 그 외 독성

### 1) 갑상선 관련 유해반응

#### (1) 갑상선 항진증/중독증

그레이브스병(Grave's disease)이나 갑상선 자율증(thyroid autonomy)을 가진 환자에서 요오드화 조영제를 사용한 후 갑상선 항진증이나 갑상선 중독증이 발생할 수 있고 이는 특히 고령의 환자에서 더 잘 나타난다. 요오드화 조영제에 의한 갑상선 항진증의 빈도는 식이 요오드가 부족한 지역에서 0.25%-0.34%, 식이 요오드가 충분한 지역에서 0.028% 정도로 보고되었다. 요오드화 조영제에 의한 갑상선 항진증에 의한 증상은 대부분 요오드화 조영제 주사 1-6주 이후에 발생하는데 증상은 다른 원인에 의한 갑상선 항진증과 다르지 않다. 즉, 체중감소, 신경과민, 열불내성, 심계항진, 부정맥 등의 증상이 발생하는데 대부분의 경우 저절로 좋아지지만 심한 경우 갑상선 중독증이 발생하여 입원 치료가 필요할 수도 있다. 따라서 그레이브스병, 다결절성 갑상선종(multinodular goiter)이나 갑상선 자율증과 같은 위험인자를 가지는 환자에서 요오드화 조영제를 사용할 때에는 주의를 기울이는 것이 좋다. 위험인자가 있는 환자에서 예방약제 사용을 시도한 연구가 있었으나 만족한 만한 결과를 얻지는 못하였고 우리나라와 같이 식이 요오드를 충분히 섭취하는 지역에서 요오드화 조영제에 의한 갑상선 항진증의 발병률이 매우 낮다는 것을 고려했을 때 위험인자가 있는 환자에서도 검사 후 내분비 전문의에게 갑상선 호르몬 수치의 변화 등을 면밀히 관찰하는 것 이외의 다른 예방적 조치는 필요치 않다.

#### (2) 갑상선암

방사성 요오드(I<sup>131</sup>) 치료를 앞두고 있는 갑상선암 환자에게는 요오드화 조영제 사용을 금지해야 한다. 요오드화 조영제를 주사하면 1주일 후 갑상선의 방사성 요오드 흡수가 50% 정도 떨어지고 이후 수 주에 걸쳐 정상화된다. 따라서 방사성 요오드 치료 전 최소 1-2개월 동안은 요오드화 조영제 사용을 금지해야 한다. 담관조영술용 조영제는 더 느리게 대사/배설되기 때문에 방사성 요오드 치료 3-4개월 전부터는 금지해야 한다.

### 2) 카테콜아민 생성 종양

이전에는 요오드화 조영제를 이용한 CT 촬영 이전에 알파차단제 및 베타차단제를 사용할 것을 추천하였으나 이후의 연구들에서 비이온성 조영제의 정맥주입 자체가 카테콜아민의 분비를 촉진시키지는 않는 것으로 밝혀졌다. 따라서 크롬친화세포종(pheochromocytoma)이나 부신경절종(paraganglioma) 등 카테콜아민 생성 종양 환자 및 기능이 파악되지 않은 부

신 우연종(adrenal incidentaloma) 환자에서 비이온성 조영제를 사용한 CT 촬영을 할 때 알파차단제 및 베타차단제와 같은 전 처치 약물을 사용할 필요는 없다. 단, 카테콜아민 생성 종양 환자에서 요오드화 조영제를 이용하여 동맥 내 혈관조영술, 특히 신동맥 혹은 부신동맥을 이용한 혈관조영술을 시행할 때에는 경구 알파차단제 및 베타차단제를 1주일 전부터 복용하여 생체징후가 안정화된 상태에서 검사를 시행해야 한다.

### 3) 폐 관련 유해반응

#### (1) 기도저항

요오드화 조영제를 사용한 후 증상이 나타날 정도의 심한 기도 수축은 약 0.01% 정도에서만 발생한다. 하지만 무증상의 1초간 강제 호기량 감소는 흔히 발생하는 것으로 알려져 있다. 기도수축을 일으키는 매개체의 분비, 콜린에스터라아제(cholinesterase)의 억제, 미주신경반사, 기관지에 대한 직접적인 작용 등이 요오드화 조영제에 의한 기도수축의 기전으로 제시되고 있지만 아직 정확한 기전은 알지 못한다. 요오드화 조영제를 사용하기 전에 예방적으로 항히스타민제나 전신 스테로이드제를 이용하는 것은 효과가 없는 것으로 알려져 있다.

#### (2) 폐동맥 고혈압

요오드화 조영제는 폐혈관 저항(pulmonary vascular resistance)을 증가시켜 폐동맥 혈압을 높일 수 있고 특히 폐혈관 고혈압이 있는 환자에서 주의해야 한다. 이런 현상의 기전은 잘 알려져 있지 않다.

#### (3) 폐부종

요오드화 조영제는 내피세포에 손상을 주거나 폐혈관 저항을 높여서 미세순환의 투과성을 증가시키고 이런 기전을 통해 폐부종이 발생할 수 있다. 증상이 없는 심부전 환자에게 다량의 조영제를 짧은 시간 동안 투여할 때 갑자기 폐부종이 발생할 수 있다.

### 4) 혈전증

요오드화 조영제는 혈액응고의 여러 과정에 영향을 줄 수 있다. 고장성 조영제의 경우 내피세포를 손상시켜 혈전을 유발할 수 있고 이런 현상은 특히 정맥 조영술 시에 자주 발생한다. 중재적 시술을 할 때 혈전증이나 색전증의 위험을 낮추는 약물이거나 중재적 시술 장치를 이용하면 조영제에 의한 혈전 발생 가능성을 최소화시킬 수 있다. 혈관조영술 시에 요오드화 조영제에 의한 혈전증을 예방하기 위해서는 혈관 내피의 손상을 방지하기 위해 세심하고 정확하게 시술을 하는 것이 가장 중요하고 저장성 혹은 등장성 조영제를 사용하는 것도 도움이 될 수 있다.

### 5) 주사용 요오드화 조영제에 과민 반응이 있던 경우 혈관 외 요오드화 조영제 사용(내시경적 역행성 담췌관 조영술, 담관조영술 등)

요오드화 조영제에 의한 과민반응은 내시경적 역행성 담췌관 조영술(Endoscopic Retrograde Cholangio-Pancreatography, ERCP) 및 경피적 담관조영술(Percutaneous Transhepatic Cholangiography, PTC) 및 위장관조영술 등의 혈관 외로 요오드화 조영제 노출될 경우에도 발생할 수 있으며 생명을 위협하는 반응 역시 가능하다. 혈관 외 조영제 노출 후 혈중 요오드(iodine)의 농도가 증가되는 것으로 알려져 있고, 이때 과민반응의 발생 보고들이 있다. 하지만 이들의 혈중 농도는 상대적으로 낮기 때문에, 그 위험도는 혈관 내로 직접 조영제를 투여하는 것에 비하여 낮을 것으로 생각된다. 혈관 외 조영제에 노출에 의한 과민 반응의 정확한 발생률은 많이 연구가 되어 있지 않다. 8681건의 ERCP에서 3건의 홍반, 발진 등의

과민반응을 보고되었고, 2000건의 ERCP에서 1건의 쇼크가 보고되었으나, 이들은 모두 자발적 우편조사 또는 후향적 연구로써 그 한계가 있다. 또한, 조영제 과민반응의 경우 혈관 내 투여의 경우에도 발생률이 낮은 것을 고려하면, 상기 연구들만으로 발생률을 결정하는 데는 한계가 있을 것으로 보인다. 하지만, ERCP 후 중증 아나필락시스 반응 발생에 대한 증례 보고들이 있기 때문에 혈관 외 조영제 투여라고 해도 신중을 기하여야 한다. 요오드화 조영제에 대한 과민반응 과거력이 있는 환자에서 혈관 외 조영제 재노출에 의한 과민반응 발생에 대한 연구결과는 거의 없다. 한 연구에서 80명의 과민반응 과거력이 있는 환자를 포함한 601명에게 아무런 전 처치 없이 ERCP를 시행하였음에도 과민반응은 한 명도 발생하지 않음을 보고하였다. 또 한 증례보고에서는 조영제 과민반응의 병력이 있는 두 명의 환자에게 ERCP 후 과민반응이 발생하지 않았다는 결과가 있다. 하지만, 전문가들은 재발 가능성을 고려하여 조영제 재노출의 회피를 권유하며, 검사가 꼭 필요한 경우, 전신 스테로이드제 및 항히스타민제의 전 처치 또는 비이온성, 저삼투성 요오드화 조영제로의 대체를 추천하고 있다. 이에 시술 전 평가로, 과거 요오드화 조영제의 과민 반응력을 확인하도록 권고하고 있다. 실제로 많은 내시경술자들은, 조영제 과민반응의 병력이 있는 환자에서 위와 같은 전 처치 방법을 이용하고 있는 것으로 나타났다. 최근 일부 연구에서는 이러한 고위험 환자들에게 대신하여 가돌리늄 조영제를 이용한 ERCP 검사 사례들이 보고되고 있다. 많은 전문가들이 혈관 외 요오드화 조영제 사용에 따른 과민반응의 재발 위험성을 고려하여, 요오드화 조영제에 과민반응 기왕력자에 대하여 조영제의 회피, 또는 꼭 검사가 필요한 경우 전 처치를 제안하고 있다. 추후 혈관 외 요오드화 조영제 사용에 따른 과민반응의 발생률 및 이전 CT용 요오드화 조영제에 과민 반응이 있었던 사람들에서의 과민 반응의 재발률을 확인하는 연구 및 이들에서의 전 처치의 효과에 대한 대규모 전향적 연구가 필요하다.

따라서 이전 CT용 요오드화 조영제에 과민 반응이 있었던 사람에서 혈관 외 요오드화 조영제를 사용해야 하는 경우에는 드물게 전신적인 재발이 나타날 수 있으므로 주의를 기울여야 한다.

## IV. 가돌리늄 조영제의 유해반응

### 1. 가돌리늄 조영제에 의한 유해반응

1980년대 말 비경구용 가돌리늄 킬레이트의 사용이 허용된 후로 다양한 가돌리늄 조영제들이 개발되어 사용되고 있다. 가돌리늄 조영제 유해반응의 빈도는 정맥주사용 요오드화 조영제보다 발생 빈도가 적고 대부분은 경증 반응으로 저절로 호전된다. 상용량의 가돌리늄 조영제(0.1-0.2 mmol/kg)를 사용했을 때 급성 유해반응의 빈도는 0.07%-2.4% 정도로 연구마다 그 결과가 매우 상이하다. 이는 연구에서 유해반응을 어떻게 정의했고, 유해반응을 누가, 어떻게 평가했느냐에 따라 그 빈도가 달라지기 때문이다. 반응은 대부분 경증으로 주사한 부위의 차가움, 구역, 구토, 두통, 주사한 부위의 열감 혹은 통증, 이상감각, 어지러움, 가려움 등이 있다. 알레르기 반응으로 의심되는 경우는 매우 드물고 빈도는 0.004%-0.7%이다. 가돌리늄 조영제에 의한 과민반응의 증상으로는 발진이나 두드러기가 가장 흔하고, 아주 드물지만 기관지수축 반응도 발생한다. 생명을 위협할 정도의 анафилакти시스(анафилактический шок)는 매우 드물다(0.001%-0.01%). анафилакти시스 반응은 대부분 조영제 주입 후 30분 이내에 발생한다. 가돌리늄 조영제에 대한 치명적인 반응도 일어나긴 하지만 빈도는 극히 드물다. 과거 가돌리늄 조영제에 대해 유해반응이 발생한 과거력이 있는 환자에서는 향후 가돌리늄 조영제에 급성 유해반응이 발생할 확률이 8배 정도 더 높다. 다른 약물이나 음식에 대한 알레르기를 포함한 다양한 알레르기와 천식을 가진 사람도 위험도가 상승한다. 한 연구에 의하면 알레르기 또는 천식 질환이 있는 환자는 급성 유해반응이 나타날 위험이 2.8배 높았다. 이전에 주사용 요오드화 조영제에 과민반응을 보인 경우 조영제 간에 교차 반응성을 보인다는 근거는 없으나 약물 알레르기의 범주에 속하기 때문에 급성 유해반응이 나타날 가능성이 상대적으로 높을 수 있다.

### 2. 가돌리늄 조영제 과민반응의 치료와 전 처치

요오드화 조영제 과민반응의 치료와 전 처치에 준하여 시행한다

### 3. 신원성전신성염증

#### 1) 임상 양상

급성 콩팥손상(급성신부전) 환자나 중증 만성신부전 환자에게 가돌리늄 조영제를 투여한 경우 신원성전신성염증이 발생할 수 있다. 신원성전신성염증은 매우 드문 질환이지만 치명적일 수 있기 때문에 중증 지연성 유해반응으로 분류할 수 있다. 조영제 투여 후 수일에서 수주 사이에(평균 한달 후) 홍반성 구진 혹은 반점, 피부 비후 및 경화가 나타난다. 가려움, 작열감 및 예리한 통증이 종종 동반된다. 관절구축이 진행되어 점차 보행이 불가능하게 된다. 가장 일반적인 초기 병변 부위는 팔다리이고 주로 다리에서 병변이 시작한다. 이후 점차 몸통까지 병변이 진행할 수 있다. 증상은 대칭적으로 발생하며 얼굴 및 목 부위에 증상이 잘 발생하지 않는 것이 특징이다. 심한 경우 내부 장기의 염증도 동반된다.

#### 2) 기전

신원성전신성염증의 원인 또는 기전은 아직 정확하게 알려지지 않았다. 가돌리늄은 MRI 촬영을 함에 있어서 필요한 원소이나 독성이 심한 원소이므로 가돌리늄만을 단독으로 쓰면 위험하다. 이런 이유로 가돌리늄은 킬레이트와 결합된 형태로 체내에 존재해야 한다. 신원성전신성염증의 기전으로 가장 널리 받아들여지는 가설은 신기능이 크게 감소한 환자에서 가돌리늄 이온이 킬레이트와 결합된 상태로 존재하지 않고 킬레이트로부터 유리된다는 것이다. 이러한 가돌리늄 이온의 유리는 다른 양



이온들이 킬레이트와 결합된 가돌리늄을 대체하는 금속전위(transmetalation) 현상에 의해 발생한다. 이때 대체되는 양이온으로는 양성자(산성환경인 경우), 칼슘, 철, 아연, 구리, 포스레놀(fosrenol), 희소 금속(rare metals) 등이 있다. 신장기능이 감소한 경우 가돌리늄 조영제의 제거시간이 지연되기 때문에 가돌리늄 이온이 유리될 확률이 높아져서 신원성전신섬유증이 발생한다고 생각된다. 자유 가돌리늄은 인산염이나 중탄산염과 같은 다른 음이온과 결합하여 불용성 침전물을 형성해 피부나 피하조직 뿐 아니라 다른 기관에도 침착된다. 이어서 혈중 섬유세포의 활성화를 포함한 섬유화 반응이 진행된다. 신원성전신섬유증 환자에서 얻은 조직에서 가돌리늄이 많이 관찰된다. 침착된 가돌리늄이 유리 상태인지, 초기 가돌리늄-킬레이트 형태로 화학적 결합이 되어 있는지, 혹은 새로 형성된 또는 다른 가돌리늄 결합 형태로 있는지는 아직 밝혀지지 않았다. 하지만, 조직 검체에서 가돌리늄의 존재를 밝히는 것은 진단에 필요하지 않기 때문에 가돌리늄을 조직검사를 통해 확인할 필요는 없다. 체내에서 모든 가돌리늄 조영제가 같은 정도로 금속전위를 일으키는 것은 아니다. 가돌리늄 킬레이트에는 선형 킬레이트와 거대고리형(macrocylic) 킬레이트 두 가지 종류가 있는데 통계적으로 보면 신원성전신섬유증 사례는 대부분 선형 킬레이트에서 발생했고 거대고리형 형태의 킬레이트에서는 거의 일어나지 않았다. 가돌리늄 이온의 유리와 신원성전신섬유증의 발생 사이의 관계가 증명된다면, 왜 가돌리늄 조영제가 종류에 따라 고위험 환자에서 신원성전신섬유증에 대한 안전성에서 많은 차이를 보이는지에 대해 설명하는 데 도움이 될 것이다.

### 3) 환자군에 따른 신원성전신섬유증의 위험성

#### (1) 지속적인 투석을 받고 있는 말기 신부전 환자

잔여 신기능이 없는 무뇨증(anuric)의 환자가 조영증강 단층촬영 검사가 필요한 경우, 만약 대체하는 것이 가능하다고 판단되면 MRI 대신 요오드화 조영제를 이용한 CT를 고려하는 것이 합리적이다. 만약 조영증강 MRI가 지속적인 투석을 받고 있는 말기신부전 환자에서 반드시 필요하다면 고위험군 조영제의 사용은 금기이다. 가능하면 진단검사에 필요한 최소한의 농도를 사용하는 것이 좋으며, 이러한 원칙은 신장기능에 상관없이 모든 환자에게 추천된다.

가돌리늄 조영증강 MRI는 가능한 혈액투석 직전에 하는 것이 추천되는데, 이는 검사 후 즉시 시행하는 혈액투석이 신원성전신섬유증의 발생 가능성을 줄일 수 있을 것으로 생각되기 때문이다. 현재까지 확실히 증명되지 않았으나 가돌리늄 조영제 투여 9시간 후에 투석을 받은 환자에서 신원성전신섬유증이 발생한 보고가 있다. 따라서 미국이나 유럽에서는 가돌리늄 조영제 노출 후 3시간 이내에 혈액투석을 하는 것을 권고하고 있다. 투석실에서 영상의학과와의 요구에 따라 투석 일정을 바꾸는 것이 현실적으로 어려운 경우, 예정된 투석일정에 시간을 맞추어 영상검사를 선행하는 것이 보다 더 현실적이다. 혈액투석을 3회 시행하면 가돌리늄 조영제가 99%가 제거된다는 보고도 있어서 한 번의 투석보다는 여러 번 투석을 받는 것이 유리할 수 있는데, 이는 가돌리늄 킬레이트의 체내 잔류시간 연장이 모종의 기전을 통해 신원성전신섬유증 발생에 영향을 줄 것이라는 가설에 근거한다. 따라서 많은 전문가들은 가돌리늄 조영제의 제거를 돕기 위해 조영제 주입 후 1) 여러 번의 투석시행, 2) 투석 시간의 연장, 3) 투석액의 유속과 용량을 늘릴 것 등을 권장한다.

복막투석은 혈액투석에 비해 신원성전신섬유증 발생 위험을 줄이는 효과가 적기 때문에 이용되지 않는다. 하지만 혈액투석을 할 수 없는 경우 복막투석만으로 22일 만에 가돌리늄 조영제의 69%가 제거된다는 보고도 있으며 복막투석 횟수의 증가로 신원성전신섬유증이 호전된 국내 보고도 있다.

#### (2) 지속적인 투석을 시행하지 않는 4기 혹은 5기 만성신부전 환자(eGFR < 30 mL/min/1.73 m<sup>2</sup>)

이러한 환자들의 경우 요오드화 조영제가 투여되면 신기능이 악화되어 투석이 필요하게 될 수 있고, 가돌리늄 조영제에 의해서는 신원성전신섬유증이 발생할 수 있어 CT를 할지, MRI를 시행할지 결정하기 어렵다. 이 환자군에서는 가돌리늄 조영

제를 피하는 것이 권장되나 만약 가돌리늄 조영제를 꼭 사용해야 하는 경우, 고위험군 조영제는 금기이며 중등도 내지는 저위험군 조영제를 진단적인 검사를 위한 최소한의 용량으로 신중하게 사용해야 한다. 또한, 일주일 동안은 가돌리늄 조영제의 재사용을 피하는 것이 바람직하다(검사를 연기하는 구체적인 기간은 신장 질환의 중증도와 검사가 시급한 정도를 고려하여 결정하도록 한다).

### (3) 3기 만성신부전 환자(eGFR 30–59 mL/min/1.73 m<sup>2</sup>)

eGFR > 30 mL/min/1.73 m<sup>2</sup>인 환자에서 가돌리늄 조영제 주입 후 신원성전신성염증이 발생할 가능성은 극히 드물다. 미국영상의학회(American College of Radiology, ACR)에서는 eGFR 수치의 변동 가능성을 고려하여 eGFR < 40 mL/min/1.73 m<sup>2</sup>인 환자들의 경우, 4기, 5기 말기신부전 환자(eGFR < 30 mL/min/1.73 m<sup>2</sup>)들과 비슷한 주의를 요할 것을 권고하고 있다. 이에 반해, eGFR 40–59 mL/min/1.73 m<sup>2</sup>인 환자의 경우 모든 가돌리늄 조영제 사용이 가능하다.

### (4) 1기 혹은 2기 만성신부전 환자(eGFR 60–119 mL/min/1.73 m<sup>2</sup>)

이 집단의 환자들에서 신원성전신성염증 발생 위험이 증가한다는 증거는 현재까지 없다. 대다수의 학자들은 이 환자들에게 모든 종류의 가돌리늄 조영제가 안전하게 사용될 수 있다는 것에 동의한다.

### (5) 급성 콩팥손상 환자

가돌리늄 조영제에 노출된 급성 콩팥손상 환자는 신원성전신성염증 발생의 위험성이 있다. 혈청 크레아티닌 수치가 실제 사구체 여과율을 반영하는 데에는 시간적인 간격이 있기 때문에 한 번의 eGFR 측정으로는 환자가 급성 콩팥손상 상태인지 알 수 없다. 따라서, 측정된 혈청 크레아티닌이나 계산된 eGFR 값과는 상관없이 급성 콩팥손상을 알고 있거나 의심되는 환자에게 가돌리늄 조영제 사용 시 주의를 기울여야 한다. 이런 환자는 가돌리늄 조영제가 반드시 필요한 상황일 경우에만 사용해야 한다. 가돌리늄 조영제 사용이 필요하다면 신원성전신성염증과 명백하게 연관된 고위험군 조영제의 사용은 금기이다. 진단적인 검사 결과를 얻기 위한 가능한 최소한의 용량을 사용하여야 한다.

### (6) 복수가 있는 환자

복수가 있는 환자에서는, 가돌리늄 조영제가 정맥투여 후 복강 내에 축적될 수 있다. 복강 내 축적된 가돌리늄 조영제의 체류기간이 길어지면 이론적으로 신원성전신성염증의 위험성이 커진다. 그러나 기저 중증 신장 질환이 없는 복수를 가진 환자에서 신원성전신성염증이 발생했다는 보고는 없다. 따라서 정상 신기능의 복수가 있는 환자에서 신원성전신성염증의 위험은 낮을 것으로 예상된다. 정상 신기능의 복수가 있는 환자에서 신원성전신성염증의 위험성을(만약에 있다면) 밝히는 추가적인 연구가 필요하다.

### (7) 임신한 환자

가돌리늄 조영제는 양수에 축적될 수 있고, 이는 이론적으로 산모 혹은 태아의 신원성전신성염증 발생 위험을 높인다. 그러나, 현재까지 산모나 태아/신생아에서 발생한 신원성전신성염증은 보고되지 않았다. 고위험군 조영제의 사용은 금기이며, 중등도 내지는 저위험군 조영제를 가능한 최소한의 용량으로 주의하여 사용해야 한다. 출산 후 신생아에 대한 추가적인 검사는 필요 없다.

### (8) 소아

소아의 신원성전신성염증 증례는 보고가 거의 없고, 6세 미만의 소아에서는 증례보고가 없다. 그럼에도 불구하고 비슷한 정도의 신질환을 가졌을 때 소아에서 어른보다 신원성전신성염증의 발생이 낮다고 추정하기에는 근거 자료가 부족한 상태이다. 그러므로 지침을 어른과 소아 모두에서 동일하게 적용하는 것이 안전하다. 한편, 일부 조산아와 신생아에서는 미성숙한 신기능으로 인해 사구체여과율(eGFR)이 30 mL/min/1.73 m<sup>2</sup>보다 작을 수 있어서 유럽 가이드라인 및 국내 식약처 지침상 신생아는 고위험군 조영제 사용의 금기이다.

#### 4. 가돌리늄 조영제의 신장 유해반응

가돌리늄 조영제의 신독성은 꽤 오래전부터 알려져 왔다. 가돌리늄 제제는 방사선 비투과성(radiodense)이고, 따라서 CT와 혈관조영술에서 요오드화 조영제 대신 방사선 불투명화(opacification)를 위해 사용될 수 있다. 그러나 X-선을 동일하게 감쇠시키는 용량에서 가돌리늄 조영제가 요오드화 조영제 보다 신독성이 더 심하기 때문에, 혈관 조영술이나 CT 같은 검사에서는 사용하면 안 된다. 혈관조영술이나 CT에서 가돌리늄 조영제를 사용하는 경우는 전 세계 어디에도 없다.

#### 5. 기타 유해반응

##### 1) 낮적혈구병 환자에서 가돌리늄 조영제의 안정성

MRI가 적혈구에 미치는 영향에 대한 초기 실험실적 연구에 의하면 완전히 환원된 낮적혈구가 자기장에 대해 수직으로 정렬될 수 있다. 이렇게 되면 낮적혈구가 작은 혈관을 통과하기 어렵고 따라서 낮적혈구 환자들에서 혈관폐쇄와 관련된 합병증이 발생할 수 있다. 이러한 가정에 의해 현재 미국 내 사용 중인 두 종류의 가돌리늄 조영제(gadoversetamide [OptiMARK, Mallinckrodt], gadoteridol [Prohance, Bracco Diagnostics]) 약물정보에서, 낮적혈구병 환자에서 주의가 필요하다고 언급하고 있다. 그렇지만 현재까지 낮적혈구병 환자에서 가돌리늄 조영제에 의한 혈관폐쇄 합병증은 아직 보고가 없고 임상적으로 의미가 있는 용혈도 관찰되지 않았다. 그러므로 낮적혈구병 환자에게 일상적인 용량의 가돌리늄 조영제를 정맥 주사했을 때의 위험성은 매우 낮거나 없으며, 낮적혈구병 환자가 가돌리늄 조영제의 적응증이 되는 경우에 가돌리늄 조영제의 사용을 보류할 이유는 없다.

##### 2) Gadoxetate disodium 사용 시의 호흡곤란

여러 연구에서 gadoxetate disodium 사용 시 역동적 T1 강조영상의 동맥기에 일시적으로 호흡으로 인한 인공물(respiratory motion-related artifact)이 나타난다고 보고하였다. 이러한 현상은 일시적인 호흡곤란 때문으로 생각되며 한 조사에 의하면 gadoxetate disodium을 사용한 환자들이 gadobenate dimeglumine을 사용한 환자들에 비해 숨이 찬 증상을 더 의미 있게 호소하였다고 한다. 보고된 “일시적인 호흡곤란”의 발생률은 영상부위, 영상프로토콜 및 주입된 양에 따라 4%에서 14%로 다양하다. 이러한 증상은 일시적인 조영제 특이 생리 반응으로 생각되며 알레르기성 기관지연축(allergic-like bronchospasm)과 같은 급성 과민반응은 아니다. 그러므로 스테로이드제 예방은 효과가 없으며 적응증이 되지 않는다. 위험인자로는 1) 고용량의 조영제 주입 (20 mL 용량 주입 시 10 mL에 비해 2배 더 자주 발생함), 2) 만성폐쇄성폐질환(COPD 환자 35%~40%에서 발생), 3) 과거력이 있는 경우(이전 검사에서 일시적 호흡 곤란이 없었던 군은 재검사시 발생률이 5%인 것에 반해 이전에 일시적인 호흡 곤란을 겪었던 환자는 재검사 시 발생률이 60%임) 등이 있다. 일시적인 호흡곤란으로 인한 인공물을 피하기 위한 방법으로는 1) 주입 용량을 최소화(≤ 10 mL) 하고, 2) 이전에 유사한 반응을 경험한 환자에게는 조영제 주입을 피하며, 3) 여러 번의 동맥기 영상을 얻는 방법 등이 있다.

##### 3) 가돌리늄 조영제의 뇌 침착

최근 가돌리늄 조영제를 주입받은 환자에서 뇌 실질 내에 가돌리늄이 침착될 수 있음이 확인되었다. 이러한 가돌리늄의 뇌 실질 침착은 뇌혈관 장벽이 손상되지 않은 정상인에서도 발생할 수 있으며 담창구나 치상핵과 같은 뇌의 특정 부위에 잘 침착하는 것으로 알려져 있다. 투여받은 조영제의 용량 및 횟수에 비례하여 침착이 일어난다고 알려져 있으며, 가돌리늄 조영제의 종류에 따라서도 그 정도가 다른 것으로 알려져 있다. 현재까지 가돌리늄 침착으로 인한 신경학적 이상은 보고되지 않

았다. 앞으로 침착 기전 및 그 임상적 의의에 대해서 광범위한 추가 연구가 필요하다.

#### 4) 카테콜아민 생성 종양

가돌리늄 조영제가 카테콜아민 생성 종양에 끼치는 영향에 관한 뚜렷한 정보는 없다. 가돌리늄 조영제에는 고삼투압 이온성(ionic with higher osmolality)과 저삼투압 비이온성(non-ionic with lower osmolality)이 있다. 가돌리늄 조영제는 보통 요오드화 조영제에 비해 5내지 10배나 적은 양을 주입하기 때문에, 고삼투압 이온성 조영제라도 삼투압 부하가 비이온성 요오드화 조영제의 삼투압 부하보다 적게 된다. 요오드화 조영제에 의한 혈장 카테콜아민의 증가가 삼투압과 관련이 있기 때문에, 가돌리늄 조영제의 적은 삼투압 부하로 인해 혈장 카테콜아민이 증가될 가능성은 거의 없다. 따라서 카테콜아민 생성 부신 종양을 가진 환자들에게 가돌리늄 조영제 정맥주사 주입 전 특별한 전 처치는 필요 없다.

#### 5) 요오드화 조영제에 대한 유해반응이 있는 경우

MRI 조영제와 CT용 요오드화 조영제는 서로 화학구조 및 성질이 다르기 때문에 한 조영제 군에 유해반응이 발생하더라도 다른 조영제 군에 유해반응이 똑같이 나타날 확률은 매우 낮다. 현재 가돌리늄 조영제와 요오드화 조영제 간에는 교차반응이 없는 것으로 생각되기 때문에 요오드화 조영제에 심한 알레르기 반응이 나타났더라도 가돌리늄 조영제는 안전하게 사용할 수 있다. 단, 알레르기 및 천식이 양쪽 조영제 군의 알레르기 반응의 공통 위험인자이기 때문에 한쪽 조영제 군에 대한 알레르기 반응이 나타나는 것 자체가 다른 조영제 군의 알레르기 반응의 위험인자가 될 수는 있다. 하지만 이 경우 임상적으로 가돌리늄 조영제 사용을 피할 필요는 없다.

## V. 특수상황에서의 조영제 사용

### 1. 임신

X-선을 이용한 영상검사가 꼭 필요한 경우, 요오드화 조영제를 임신 한 여성에게 사용할 수 있다. 임신 중 산모에게 요오드화 조영제를 준 경우 출산 첫 주 이내에 신생아 갑상선 기능 확인이 필요하다.

임산부에게 조영증강 MRI가 반드시 필요한 경우, 고위험군 조영제의 사용은 금기이며, 중등도 내지는 저위험군 조영제를 가능한 최소한의 용량으로 가돌리늄 조영제를 사용할 수 있다. 출산 후 신생아에 대한 추가적인 검사는 필요 없다.

조영제 부작용의 과거력이 있는 임산부에서 조영제를 이용한 검사가 필요한 경우 일반적인 전 처치가 가능하며 해당 분야 전문의의 자문을 구하는 것이 좋다.

### 2. 수유

요오드화 조영제를 투여받은 산모에서 정상적인 모유수유 가능하다.

가돌리늄 조영제의 경우 일반적으로 고위험군 가돌리늄 조영제를 투여받았을 때에는 24시간 동안 모유수유를 중단한다. 중등도 혹은 저위험군 조영제를 투여받았을 시 반드시 모유수유를 중단할 필요는 없다.

### 3. 소아

#### 1) 소아에서 요오드화 조영제의 사용

가능하면 삼투압이 낮고 점도가 낮은 조영제를 사용한다. 고삼투압을 가진 조영제는 혈관 외 체액을 끌어와 혈액량을 증가시키며 이러한 체액 이동이 많을 시엔 심부전이나 폐부종이 발생할 가능성이 있기 때문에 가능한 낮은 삼투압의 조영제를 사용한다. 또한 소아는 성인에 비해 혈관이 더 작으며, 사용하는 캐놀라 또한 더 작기 때문에 조영제 주입 시 압력을 줄이고 적절한 주입속도를 확보하기 위해 낮은 점도의 조영제를 사용하여야 한다.

어린 소아일수록 체구가 작아 낮은 관전압을 사용할 수 있으므로 상대적으로 낮은 농도의 조영제를 사용하며, 또한 순환 혈액량은 체중에 비해 상대적으로 많기 때문에, 단위 체중당 조영제의 양은 늘릴 필요가 있다. 일반적으로 150-350 mgI/mL의 농도를 가진 조영제를 신생아는 kg당 2 mL(최대 kg당 3 mL), 영아 kg당 2 mL, 그 이후에는 kg당 1-1.5 mL 사용한다.

소아에서 요오드화 조영제 과민반응의 빈도는 0.18%-0.9% 정도이며 성인에 비해서는 과민반응의 발생 빈도가 낮다고 알려져 있다. 과민 반응 발생 시 일반적인 처치는 성인과 동일하며 조영제 과민반응의 병력이 있는 경우 성인과 마찬가지로 전신 스테로이드제 및 항히스타민제를 이용한 전 처치가 가능하다.

소아 신기능을 평가하는 데 있어, 소아는 성인에 비해 상대적으로 근육량이 적어 혈청 크레아티닌 수치가 정상적으로도 낮다. 따라서 소아의 사구체 여과율을 계산하기 위해 성인과는 다른 적절한 계산식을 사용하여야 한다. 신기능이 저하된 소아에서는 성인과 비슷한 조영제 신독성을 예방을 위한 처치가 필요하다.

#### 2) 소아에서 가돌리늄 조영제의 사용

소아에게 조영증강 MRI가 필요한 경우, 가장 안정적인 가돌리늄 조영제(거대고리형 킬레이트)를 가능한 최소한의 용량으로 사용한다. 가돌리늄 조영제는 요오드화 조영제에 비해 더 적은 양을 더 느린 속도로 주입하기 때문에 삼투압 및 점도와 같은 물리적 특성이 특별히 중요하지 않다.

소아에서 가돌리늄 조영제 과민반응의 빈도는 0.04%–0.05% 정도이며, 과민 반응 발생 시 일반적인 처치는 성인과 동일하다. 성인과 마찬가지로 급성 콩팥손상이 있거나 사구체 여과율(eGFR)이 30보다 작은 소아 환자 경우는 가돌리늄 조영제의 사용을 피한다. 신기능이 미숙한 미숙아 및 신생아의 경우 주의하여 사용한다.

#### 4. 약물 상호작용

##### 1) 일반적인 권고안

환자의 약물 복용력을 구체적으로 조사하고, 조영제 주입을 정확하고 구체적으로 기록(시간, 용량, 조영제 이름) 하며, 주사제와 튜브에서 조영제와 다른 약들이 섞이지 않도록 한다.

##### 2) 특별한 주의를 요하는 약물

메트포르민: 조영제 신독성 부분 참고

신독성 약물: 조영제 신독성 부분 참고(사이클로스포린, 시스플라틴, 아미노글라이코사이드, NSAIDs)

베타차단제: 기관지수축 또는 아나필락시스가 발생한 경우 치료반응을 저하시킬 수 있음

인터류킨2: 요오드화 조영제 지연성 과민반응 참고

#### 5. 임상검사 상호작용

##### 1) 혈액/소변 임상병리학적 검사

조영제 주입 24시간 이내에 모은 혈액과 소변으로 시행한 전해질 등의 일반화학 검사는 정확하지 않을 수 있으므로 검사 해석 시 주의를 요한다. 특히 혈액응고 검사는 6시간 이내에는 많은 영향을 받을 수 있고 혈액일반화학검사, 중금속 검사, 소변 단백질 정량 등에 24시간까지 다양한 영향을 미칠 수 있다.

##### 2) 동위원소 검사 및 치료

요오드화 조영제 투여를 받은 후 2달 동안은 갑상선 동위원소 스캔 검사는 피해야 하며 방사성 요오드 치료 예정 환자는 치료 전 최소 1-2달 동안은 요오드화 조영제 사용을 피해야 한다.

99mTc 동위원소를 사용하는 뼈 스캔, 적혈구 스캔 검사는 요오드화 조영제 사용 후 최소 24시간 뒤에 시행한다.

## REFERENCES

### 전반

1. 대한영상의학회, 대한천식알레르기학회. 주사용 요오드화 조영제 유해반응에 관한 한국 임상진료 지침, 1판. 2011.
2. 대한영상의학회, 대한천식알레르기학회. 자기공명영상용 가돌리늄 조영제 유해반응에 관한 한국 임상진료 지침, 1판. 2012.
3. Caro JJ, Trindade E, McGregor M. The risks of death and of severe nonfatal reactions with high- vs low-osmolality contrast media: a meta-analysis. *AJR Am J Roentgenol* 1991;156:825-32.
4. Lang DM, Alpern MB, Visintainer PF, Smith ST. Increased risk for anaphylactoid reaction from contrast media in patients on beta-adrenergic blockers or with asthma. *Ann Intern Med* 1991;115:270-6.
5. Kim MH, Park CH, Kim DI, et al. Surveillance of contrast-media-induced hypersensitivity reactions using signals from an electronic medical recording system. *Ann Allergy Asthma Immunol* 2012;108:167-71.

6. Lee SY, Lim KW, Chang YS. Radiocontrast media hypersensitivity in the Asia Pacific region. *Asia Pac Allergy* 2014;4:119-25.
7. Yoon SH, Lee SY, Kang HR, et al. Skin tests in patients with hypersensitivity reaction to iodinated contrast media: a meta-analysis. *Allergy* 2015;70:625-37.
8. Rose TA, Jr., Choi JW. Intravenous Imaging Contrast Media Complications: The Basics That Every Clinician Needs to Know. *Am J Med* 2015;128:943-9.
9. Media. ACoRCoDaC. ACR manual on contrast media, version 10. ACR2015.
10. Thomsen HS WJ. Contrast media: safety issues and ESUR guidelines2014.
11. Brockow K, Romano A, Aberer W, et al. Skin testing in patients with hypersensitivity reactions to iodinated contrast media - a European multi-center study. *Allergy* 2009;64:234-41.
12. Brockow K, Ring J. Classification and pathophysiology of radiocontrast media hypersensitivity. *Chem Immunol Allergy* 2010;95:157-69.
13. Brockow K, Ring J. Anaphylaxis to radiographic contrast media. *Curr Opin Allergy Clin Immunol* 2011;11:326-31.
14. Caimmi S, Benyahia B, Suau D, et al. Clinical value of negative skin tests to iodinated contrast media. *Clin Exp Allergy* 2010;40:805-10.
15. Radiology ESou. ESUR Guidelines on Contrast Media, version 7. 2011.
16. Goksel O, Aydin O, Atasoy C, et al. Hypersensitivity reactions to contrast media: prevalence, risk factors and the role of skin tests in diagnosis--a cross-sectional survey. *Int Arch Allergy Immunol* 2011;155:297-305.
17. Gomi T, Nagamoto M, Hasegawa M, et al. Are there any differences in acute adverse reactions among five low-osmolar non-ionic iodinated contrast media? *Eur Radiol* 2010;20:1631-5.
18. Kim SH, Lee SH, Lee SM, et al. Outcomes of premedication for non-ionic radio-contrast media hypersensitivity reactions in Korea. *Eur J Radiol* 2011;80:363-7.
19. Kim SS, Park CH, Park MJ, et al. Adverse Reactions to Radio-Contrast Media in Computed Tomography (CT) in General Population: Incidence and Clinical Features. *Korean J Asthma Allergy Clin Immunol DE - 2007-09-01* 2007;27:157-61.
20. Mayorga C, Sanz ML, Gamboa PM, et al. In vitro diagnosis of immediate allergic reactions to drugs: an update. *J Investig Allergol Clin Immunol* 2010;20:103-9.
21. Simons FE, Arduso LR, Bilo MB, et al. World Allergy Organization anaphylaxis guidelines: summary. *J Allergy Clin Immunol* 2011;127:587-93 e1-22.
22. Stacul F, van der Molen AJ, Reimer P, et al. Contrast induced nephropathy: updated ESUR Contrast Media Safety Committee guidelines. *Eur Radiol* 2011;21:2527-41.
23. Wolf GL, Arenson RL, Cross AP. A prospective trial of ionic vs nonionic contrast agents in routine clinical practice: comparison of adverse effects. *AJR Am J Roentgenol* 1989;152:939-44.
24. Abe S, Fukuda H, Tobe K, Ibukuro K. Protective effect against repeat adverse reactions to iodinated contrast medium: Premedication vs. changing the contrast medium. *Eur Radiol* 2016;26:2148-54.
25. Hintze G, Blombach O, Fink H, Burkhardt U, Kobberling J. Risk of iodine-induced thyrotoxicosis after coronary angiography: an investigation in 788 unselected subjects. *Eur J Endocrinol* 1999;140:264-7.
26. de Bruin TW. Iodide-induced hyperthyroidism with computed tomography contrast fluids. *Lancet* 1994;343:1160-1.
27. Nolte, Muller R, Siggelkow H, Emrich D, Hufner M. Prophylactic application of thyrostatic drugs during excessive iodine exposure in euthyroid patients with thyroid autonomy: a randomized study. *Eur J Endocrinol* 1996;134:337-41.
28. Lawrence JE, Lamm SH, Braverman LE. The use of perchlorate for the prevention of thyrotoxicosis in patients given iodine rich contrast agents. *J Endocrinol Invest* 1999;22:405-7.
29. Bailey CJ, Turner RC. Metformin. *N Engl J Med* 1996;334:574-9.
30. Mukherjee JJ, Peppercorn PD, Reznick RH, et al. Pheochromocytoma: effect of nonionic contrast medium in CT on circulating catecholamine levels. *Radiology* 1997;202:227-31.
31. Runge VM. Safety of approved MR contrast media for intravenous injection. *J Magn Reson Imaging* 2000;12:205-13.
32. Murphy KP, Szopinski KT, Cohan RH, Mermillod B, Ellis JH. Occurrence of adverse reactions to gadolinium-based contrast material and management of patients at increased risk: a survey of the American Society of Neuroradiology Fellowship Directors. *Acad Radiol* 1999;6:656-64.
33. Davenport MS, Dillman JR, Cohan RH, et al. Effect of abrupt substitution of gadobenate dimeglumine for gadopentetate dimeglumine on rate of allergic-like reactions. *Radiology* 2013;266:773-82.
34. Murphy KJ, Brunberg JA, Cohan RH. Adverse reactions to gadolinium contrast media: a review of 36 cases. *AJR Am J Roentgenol* 1996;167:847-9.
35. Jordan RM, Mintz RD. Fatal reaction to gadopentetate dimeglumine. *AJR Am J Roentgenol* 1995;164:743-4.
36. Jung JW, Kang HR, Kim MH, et al. Immediate hypersensitivity reaction to gadolinium-based MR contrast media. *Radiology* 2012;264:414-22.
37. Lasser EC, Berry CC, Talner LB, et al. Pretreatment with corticosteroids to alleviate reactions to intravenous contrast material. *N Engl J Med* 1987;317:845-9.
38. Greenberger PA, Patterson R. The prevention of immediate generalized reactions to radiocontrast media in high-risk patients. *J Allergy Clin Immunol* 1991;87:867-72.

39. Greenberger PA, Halwig JM, Patterson R, Wallemark CB. Emergency administration of radiocontrast media in high-risk patients. *J Allergy Clin Immunol* 1986;77:630-4.

## 조영제 가온

1. Brunette J, Mongrain R, Rodes-Cabau J, Larose E, Leask R, Bertrand OF. Comparative rheology of low- and iso-osmolality contrast agents at different temperatures. *Catheter Cardiovasc Interv* 2008;71:78-83.
2. Halsell RD. Heating contrast media: role in contemporary angiography. *Radiology* 1987;164:276-8.
3. Roth R, Akin M, Deligonul U, Kern MJ. Influence of radiographic contrast media viscosity to flow through coronary angiographic catheters. *Cathet Cardiovasc Diagn* 1991;22:290-4.
4. Schwab SA, Kuefner MA, Anders K, et al. Peripheral intravenous power injection of iodinated contrast media: the impact of temperature on maximum injection pressures at different cannula sizes. *Acad Radiol* 2009;16:1502-8.
5. Kok M, Muhl C, Mingels AA, et al. Influence of contrast media viscosity and temperature on injection pressure in computed tomographic angiography: a phantom study. *Invest Radiol* 2014;49:217-23.
6. Turner E, Kentor P, Melamed JL, Rao G, Zeitz HJ. Frequency of anaphylactoid reactions during intravenous urography with radiographic contrast media at two different temperatures. *Radiology* 1982;143:327-9.
7. Vergara M, Seguel S. Adverse reactions to contrast media in CT: effects of temperature and ionic property. *Radiology* 1996;199:363-6.
8. Davenport MS, Wang CL, Bashir MR, Neville AM, Paulson EK. Rate of contrast material extravasations and allergic-like reactions: effect of extrinsic warming of low-osmolality iodinated CT contrast material to 37 degrees C. *Radiology* 2012;262:475-84.
9. Jacobsen EA, Mortensen E, Refsum H, Klow NE. The effect of the temperature of contrast media on cardiac electrophysiology and hemodynamics during coronary arteriography. *Invest Radiol* 1992;27:942-6.
10. ACR manual on contrast media, version 10. ACR2015.
11. Hazirolan T, Turkbey B, Akpınar E, et al. The impact of warmed intravenous contrast material on the bolus geometry of coronary CT angiography applications. *Korean J Radiol* 2009;10:150-5.
12. Thomsen HS WJ. Contrast media: safety issues and ESUR guidelines2014.

## 금식

1. Gomi T, Nagamoto M, Hasegawa M, et al. Are there any differences in acute adverse reactions among five low-osmolar non-ionic iodinated contrast media? *Eur Radiol* 2010;20:1631-5.
2. Wendt-Nordahl G, Rotert H, Trojan L, et al. Intravenous contrast media in uroradiology: evaluation of safety and tolerability in almost 50,000 patients. *Med Princ Pract* 2006;15:358-61.
3. Kwon OK, Oh CW, Park H, et al. Is fasting necessary for elective cerebral angiography? *AJNR Am J Neuroradiol* 2011;32:908-10.
4. American Society of Anesthesiologists C. Practice guidelines for preoperative fasting and the use of pharmacologic agents to reduce the risk of pulmonary aspiration: application to healthy patients undergoing elective procedures: an updated report by the American Society of Anesthesiologists Committee on Standards and Practice Parameters. *Anesthesiology* 2011;114:495-511.
5. Wagner HJ, Evers JP, Hoppe M, Klose KJ. [Must the patient fast before intravascular injection of a non-ionic contrast medium? Results of a controlled study]. *Rofo* 1997;166:370-5.
6. Oowaki K, Saigusa H, Ojiri H, et al. [Relationship between oral food intake and nausea caused by intravenous injection of iodinated contrast material]. *Nihon Igaku Hoshasen Gakkai Zasshi* 1994;54:476-9.
7. Lee BY, Ok JJ, Abdelaziz Elsayed AA, Kim Y, Han DH. Preparative fasting for contrast-enhanced CT: reconsideration. *Radiology* 2012;263:444-50.
8. Kharazmi SA, Kamat PP, Simoneaux SF, Simon HK. Violating traditional NPO guidelines with PO contrast before sedation for computed tomography. *Pediatr Emerg Care* 2013;29:979-81.
9. Silverstein J, Grand D, Kawatu D, Shah SA, Steinkeler J, LeLeiko N. Feasibility of using MR enterography for the assessment of terminal ileitis and inflammatory activity in children with Crohn disease. *J Pediatr Gastroenterol Nutr* 2012;55:173-7.
10. Bartolotta TV, Taibbi A, Galia M, et al. Gastrointestinal stromal tumour: 40-row multislice computed tomography findings. *Radiol Med* 2006;111:651-60.
11. Reittner P, Goritschnig T, Petritsch W, et al. Multiplanar spiral CT enterography in patients with Crohn's disease using a negative oral contrast material: initial results of a noninvasive imaging approach. *Eur Radiol* 2002;12:2253-7.
12. Mani NB, Suri S, Gupta S, Wig JD. Two-phase dynamic contrast-enhanced computed tomography with water-filling method for staging of gastric carcinoma. *Clin Imaging* 2001;25:38-43.
13. D'Elia F, Zingarelli A, Palli D, Grani M. Hydro-dynamic CT preoperative staging of gastric cancer: correlation with pathological findings. A prospective study of 107 cases. *Eur Radiol* 2000;10:1877-85.



14. Lee JH, Jeong YK, Kim DH, et al. Two-phase helical CT for detection of early gastric carcinoma: importance of the mucosal phase for analysis of the abnormal mucosal layer. *J Comput Assist Tomogr* 2000;24:777-82.
15. Matsuoka Y, Masumoto T, Koga H, et al. Positive and negative oral contrast agents for combined abdominal and pelvic helical CT: first iodinated agent and second water. *Radiat Med* 2000;18:213-6.
16. Horton KM, Eng J, Fishman EK. Normal enhancement of the small bowel: evaluation with spiral CT. *J Comput Assist Tomogr* 2000;24:67-71.
17. Kang BC, Kim JH, Kim KW, et al. Value of the dynamic and delayed MR sequence with Gd-DTPA in the T-staging of stomach cancer: correlation with the histopathology. *Abdom Imaging* 2000;25:14-24.
18. Dux M, Richter GM, Hansmann J, Kuntz C, Kauffmann GW. Helical hydro-CT for diagnosis and staging of gastric carcinoma. *J Comput Assist Tomogr* 1999;23:913-22.
19. Gossios KJ, Tsianos EV, Demou LL, et al. Use of water or air as oral contrast media for computed tomographic study of the gastric wall: comparison of the two techniques. *Gastrointest Radiol* 1991;16:293-7.
20. Federle MP, Yagan N, Peitzman AB, Krugh J. Abdominal trauma: use of oral contrast material for CT is safe. *Radiology* 1997;205:91-3.
21. Lim-Dunham JE, Narra J, Benya EC, Donaldson JS. Aspiration after administration of oral contrast material in children undergoing abdominal CT for trauma. *AJR Am J Roentgenol* 1997;169:1015-8.
22. Peterson CM, Lin M, Pilgram T, Heiken JP. Prospective randomized trial of iohexol 350 versus meglumine sodium diatrizoate as an oral contrast agent for abdominopelvic computed tomography. *J Comput Assist Tomogr* 2011;35:202-5.
23. Garra G, Singer AJ, Bamber D, Chohan J, Troxell R, Thode HC, Jr. Pretreatment of patients requiring oral contrast abdominal computed tomography with antiemetics: a randomized controlled trial of efficacy. *Ann Emerg Med* 2009;53:528-33.
24. Wrobel W, Sinkiewicz W, Gordon M, Wozniak-Wisniewska A. Oral versus intravenous hydration and renal function in diabetic patients undergoing percutaneous coronary interventions. *Kardiol Pol* 2010;68:1015-20.
25. Mueller-Lenke N, Buerkle G, Klima T, Breidhardt T, Buettner HJ, Mueller C. Incidence of contrast-induced nephropathy with volume supplementation--insights from a large cohort. *Med Princ Pract* 2008;17:409-14.
26. Sutherland AD, Maltby JR, Sale JP, Reid CR. The effect of preoperative oral fluid and ranitidine on gastric fluid volume and pH. *Can J Anaesth* 1987;34:117-21.

## 조영제 사용시 감염관리

1. Jung, S.E., Prevention of Infection from Contrast Agents. *jkma*, 2020. 63(3): p. 141-144. Medical Service Act. Act No. 16555 (August 27, 2019).
2. Buerke B, Mellmann A, Stehling C, Wessling J, Heindel W, Juergens KU. Microbiologic contamination of automatic injectors at MDCT: experimental and clinical investigations. *AJR Am J Roentgenol* 2008;191:W283-W287.
3. Buerke B, Puesken M, Mellmann A, Seifarth H, Heindel W, Wessling J. Microbiologic contamination and time efficiency of use of automatic MDCT injectors with prefilled syringes: results of a clinical investigation. *AJR Am J Roentgenol* 2010;194:299-303.
4. Buerke B, Puesken M, Mellmann A, Schuelke C, Knauer A, Heindel W, Wessling J. Automatic MDCT injectors: hygiene and efficiency of disposable, prefilled, and multidosing roller pump systems in clinical routine. *AJR Am J Roentgenol* 2011;197:W226-W232.
5. Lee DH, Jung KY, Choi YH. Use of maximal sterile barrier precautions and/or antimicrobial-coated catheters to reduce the risk of central venous catheter-related bloodstream infection. *Infect Control Hosp Epidemiol* 2008;29:947-950.

## 조영제의 혈관 외 유출

1. ACR manual on contrast media, version 10. ACR2015.
2. Wang CL, Cohan RH, Ellis JH, Adusumilli S, Dunnick NR. Frequency, management, and outcome of extravasation of nonionic iodinated contrast medium in 69,657 intravenous injections. *Radiology* 2007;243:80-7.
3. Reynolds PM, MacLaren R, Mueller SW, Fish DN, Kiser TH. Management of extravasation injuries: a focused evaluation of noncytotoxic medications. *Pharmacotherapy* 2014;34:617-32.
4. Hastings-Tolsma MT, Yucha CB, Tompkins J, Robson L, Szeverenyi N. Effect of warm and cold applications on the resolution of i.v. infiltrations. *Res Nurs Health* 1993;16:171-8.
5. Kreidieh FY, Moukadem HA, El Saghir NS. Overview, prevention and management of chemotherapy extravasation. *World J Clin Oncol* 2016;7:87-97.
6. Elam EA, Dorr RT, Lagel KE, Pond GD. Cutaneous ulceration due to contrast extravasation. Experimental assessment of injury and potential antidotes. *Invest Radiol* 1991;26:13-6.
7. Sum W, Ridley LJ. Recognition and management of contrast media extravasation. *Australas Radiol* 2006;50:549-52.
8. Dougherty L. Extravasation: prevention, recognition and management. *Nurs Stand* 2010;24:48-55; quiz 6, 60.
9. Tsai YS, Cheng SM, Ng SP, et al. Squeeze maneuver: an easy way to manage radiological contrast-medium extravasation. *Acta Radiol*

2007;48:605-7.

10. Laurie SW, Wilson KL, Kernahan DA, Bauer BS, Vistnes LM. Intravenous extravasation injuries: the effectiveness of hyaluronidase in their treatment. *Ann Plast Surg* 1984;13:191-4.
11. McAlister WH, Palmer K. The histologic effects of four commonly used media for excretory urography and an attempt to modify the responses. *Radiology* 1971;99:511-6.
12. Rowlett J. Extravasation of contrast media managed with recombinant human hyaluronidase. *Am J Emerg Med* 2012;30:2102 e1-3.
13. Cochran ST, Bomyea K, Kahn M. Treatment of iodinated contrast material extravasation with hyaluronidase. *Acad Radiol* 2002;9 Suppl 2:S544-6.
14. Bellin MF, Jakobsen JA, Tomassin I, et al. Contrast medium extravasation injury: guidelines for prevention and management. *Eur Radiol* 2002;12:2807-12.

## 피부시험

1. Caimmi S, Benyahia B, Suau D, et al. Clinical value of negative skin tests to iodinated contrast media. *Clin Exp Allergy* 2010;40:805-10.
2. Kim SH, Jo EJ, Kim MY, et al. Clinical value of radiocontrast media skin tests as a prescreening and diagnostic tool in hypersensitivity reactions. *Ann Allergy Asthma Immunol* 2013;110:258-62.
3. Thomsen HS WJ. Contrast media: safety issues and ESUR guidelines 2014.
4. ACR manual on contrast media, version 10. ACR 2015.
5. Lee JH, Kwon OY, Park SY, et al. Validation of the prescreening intradermal skin test for predicting hypersensitivity to iodinated contrast media: a prospective study with ICM challenge. *J Allergy Clin Immunol Pract* 2020;8:267-272.

## 조영제 교체시 피부시험

1. Yoon SH, Lee SY, Kang HR, et al. Skin tests in patients with hypersensitivity reaction to iodinated contrast media: a meta-analysis. *Allergy* 2015;70:625-37.
2. Ahn YH, Koh YI, Kim JH, et al. The potential utility of iodinated contrast media (ICM) skin testing in patients with ICM hypersensitivity. *J Korean Med Sci* 2015;30:245-51.
3. Della-Torre E, Berti A, Yacoub MR, et al. Proposal of a skin tests based approach for the prevention of recurrent hypersensitivity reactions to iodinated contrast media. *Eur Ann Allergy Clin Immunol* 2015;47:77-85.
4. Kwon OY, Lee JH, Park SY, et al. Novel strategy for the prevention of recurrent hypersensitivity reactions to radiocontrast media based on skin testing. *J Allergy Clin Immunol Pract* 2019;7:2213-2198.
5. Trautmann A, Brockow K, Behle V, et al. Radiocontrast media hypersensitivity: skin testing differentiates allergy from nonallergic reactions and identifies a safe alternative as proven by intravenous provocation. *J Allergy Clin Immunol Pract* 2019;7:2218-2224.
6. Torres MJ, Trautmann A, Bohm I, et al. Practice parameters for diagnosing and managing iodinated contrast media hypersensitivity. *Allergy* 2021;76:1325-1339.

## 급성 콩팥손상

1. Media ACoDaC. ACR Manual on Contrast Media. <https://www.acr.org/Clinical-Resources/Contrast-Manual>. Accessed April 22, 2021.
2. Radiology ESOU. ESUR Guidelines on Contrast Media, version 10. 2018.
3. Section 2: AKI Definition. *Kidney Int Suppl* (2011) 2012;2:19-36.
4. Baumgarten DA, Ellis JH. Contrast-induced nephropathy: contrast material not required? *AJR Am J Roentgenol* 2008;191:383-6.
5. Davenport MS, Cohan RH, Khalatbari S, Ellis JH. The challenges in assessing contrast-induced nephropathy: where are we now? *AJR Am J Roentgenol* 2014;202:784-9.
6. Davenport MS, Khalatbari S, Cohan RH, Dillman JR, Myles JD, Ellis JH. Contrast material-induced nephrotoxicity and intravenous low-osmolality iodinated contrast material: risk stratification by using estimated glomerular filtration rate. *Radiology* 2013;268:719-28.
7. Davenport MS, Khalatbari S, Dillman JR, Cohan RH, Caoili EM, Ellis JH. Contrast material-induced nephrotoxicity and intravenous low-osmolality iodinated contrast material. *Radiology* 2013;267:94-105.
8. Ellis JH, Cohan RH. Reducing the risk of contrast-induced nephropathy: a perspective on the controversies. *AJR Am J Roentgenol* 2009;192:1544-9.
9. Katzberg RW, Newhouse JH. Intravenous contrast medium-induced nephrotoxicity: is the medical risk really as great as we have come to believe? *Radiology* 2010;256:21-8.
10. McDonald JS, McDonald RJ, Carter RE, Katzberg RW, Kallmes DF, Williamson EE. Risk of intravenous contrast material-mediated acute kidney injury: a propensity score-matched study stratified by baseline-estimated glomerular filtration rate. *Radiology* 2014;271:65-73.

11. McDonald JS, McDonald RJ, Comin J, et al. Frequency of acute kidney injury following intravenous contrast medium administration: a systematic review and meta-analysis. *Radiology* 2013;267:119-28.
12. McDonald RJ, McDonald JS, Bida JP, et al. Intravenous contrast material-induced nephropathy: causal or coincident phenomenon? *Radiology* 2013;267:106-18.
13. Newhouse JH, Kho D, Rao QA, Starren J. Frequency of serum creatinine changes in the absence of iodinated contrast material: implications for studies of contrast nephrotoxicity. *AJR Am J Roentgenol* 2008;191:376-82.
14. Newhouse JH, RoyChoudhury A. Quantitating contrast medium-induced nephropathy: controlling the controls. *Radiology* 2013;267:4-8.
15. Rao QA, Newhouse JH. Risk of nephropathy after intravenous administration of contrast material: a critical literature analysis. *Radiology* 2006;239:392-7
16. Stacul F, van der Molen AJ, Reimer P, et al. Contrast induced nephropathy: updated ESUR Contrast Media Safety Committee guidelines. *European radiology* 2011;21:2527-41.
17. Parfrey PS, Griffiths SM, Barrett BJ, et al. Contrast material-induced renal failure in patients with diabetes mellitus, renal insufficiency, or both. A prospective controlled study. *The New England journal of medicine* 1989;320:143-9.
18. Abujudeh HH, Gee MS, Kaewlai R. In emergency situations, should serum creatinine be checked in all patients before performing second contrast CT examinations within 24 hours? *Journal of the American College of Radiology : JACR* 2009;6:268-73
19. Trivedi H, Foley WD. Contrast-induced nephropathy after a second contrast exposure. *Renal failure* 2010;32:796-801.
20. Nyman U, Ahlqvist J, Aspelin P, et al. Preventing contrast medium-induced acute kidney injury : Side-by-side comparison of Swedish-ESUR guidelines. *European radiology* 2018;28:5384-95.
21. Too CW, Ng WY, Tan CC, Mahmood MI, Tay KH. Screening for impaired renal function in outpatients before iodinated contrast injection: Comparing the Choyke questionnaire with a rapid point-of-care-test. *European journal of radiology* 2015;84:1227-31.
22. Choyke PL, Cady J, DePollar SL, Austin H. Determination of serum creatinine prior to iodinated contrast media: is it necessary in all patients? *Techniques in urology* 1998;4:65-9.
23. Liss P, Persson PB, Hansell P, Lagerqvist B. Renal failure in 57 925 patients undergoing coronary procedures using iso-osmolar or low-osmolar contrast media. *Kidney international* 2006;70:1811-7.
24. Weisbord SD, Palevsky PM. Prevention of contrast-induced nephropathy with volume expansion. *Clinical journal of the American Society of Nephrology : CJASN* 2008;3:273-80.
25. Solomon RJ, Natarajan MK, Doucet S, et al. Cardiac Angiography in Renally Impaired Patients (CARE) study: a randomized double-blind trial of contrast-induced nephropathy in patients with chronic kidney disease. *Circulation* 2007;115:3189-96.
26. Nijssen EC, Nelemans PJ, Rennenberg RJ, Theunissen RA, van Ommen V, Wildberger JE. Prophylaxis in High-Risk Patients With eGFR < 30 mL/min/1.73 m<sup>2</sup>: Get the Balance Right. *Investigative radiology* 2019;54:580-88.
27. Nijssen EC, Rennenberg RJ, Nelemans PJ, et al. Prophylactic hydration to protect renal function from intravascular iodinated contrast material in patients at high risk of contrast-induced nephropathy (AMACING): a prospective, randomised, phase 3, controlled, open-label, non-inferiority trial. *Lancet (London, England)* 2017;389:1312-22.
28. Solomon R, Werner C, Mann D, D'Elia J, Silva P. Effects of saline, mannitol, and furosemide on acute decreases in renal function induced by radiocontrast agents. *The New England journal of medicine* 1994;331:1416-20.
29. Bailey CJ, Turner RC. Metformin. *The New England journal of medicine*. 1996;334(9):574-579.
30. Dunn CJ, Peters DH. Metformin. A review of its pharmacological properties and therapeutic use in non-insulin-dependent diabetes mellitus. *Drugs*. 1995;49(5):721-749.
31. Sirtori CR, Pasik C. Re-evaluation of a biguanide, metformin: mechanism of action and tolerability. *Pharmacological research: the official journal of the Italian Pharmacological Society*. 1994;30(3):187-228.
32. Wiholm BE, Myrhed M. Metformin-associated lactic acidosis in Sweden 1977-1991. *European journal of clinical pharmacology*. 1993;44(6):589-591.

## 급성반응 예방을 위한 전 처치

1. Katayama H, Yamaguchi K, Kozuka T, Takashima T, Seez P, Matsuura K. Adverse reactions to ionic and nonionic contrast media. A report from the Japanese Committee on the Safety of Contrast Media. *Radiology* 1990;175:621-8.
2. Kopp AF, Mortelet KJ, Cho YD, Palkowitsch P, Bettmann MA, Claussen CD. Prevalence of acute reactions to iopromide: postmarketing surveillance study of 74,717 patients. *Acta Radiol* 2008;49:902-11.
3. Brockow K, Sanchez-Borges M. Hypersensitivity to contrast media and dyes. *Immunol Allergy Clin North Am* 2014;34:547-64, viii.
4. Dunskey EH, Zweiman B, Fischler E, Levy DA. Early effects of corticosteroids on basophils, leukocyte histamine, and tissue histamine. *J Allergy Clin Immunol* 1979;63:426-32.
5. Small P, Satin R, Palayew MJ, Hyams B. Prophylactic antihistamines in the management of radiographic contrast reactions. *Clin Allergy*

1982;12:289-94.

6. Lasser EC, Berry CC, Talner LB, et al. Pretreatment with corticosteroids to alleviate reactions to intravenous contrast material. *N Engl J Med* 1987;317:845-9.
7. Lasser EC, Berry CC, Mishkin MM, Williamson B, Zheutlin N, Silverman JM. Pretreatment with corticosteroids to prevent adverse reactions to nonionic contrast media. *AJR Am J Roentgenol* 1994;162:523-6.
8. Kim SH, Lee SH, Lee SM, et al. Outcomes of premedication for non-ionic radio-contrast media hypersensitivity reactions in Korea. *Eur J Radiol* 2011;80:363-7.
9. Chevrot A, Chevrot L, Sarrat P, Wallays C. [Betamethasone in the prevention of allergic complications caused by intravenous iodine contrast media]. *Ann Radiol (Paris)* 1988;31:193-6.
10. Smith DC, Taylor FC, McKinney JM. Dimenhydrinate pretreatment in patients receiving intra-arterial ioxaglate: effect on nausea and vomiting. *Can Assoc Radiol J* 1995;46:449-53.
11. Lasser EC. Pretreatment with corticosteroids to prevent reactions to i.v. contrast material: overview and implications. *AJR Am J Roentgenol* 1988;150:257-9.
12. Liccardi G, Lobefalo G, Di Florio E, et al. Strategies for the prevention of asthmatic, anaphylactic and anaphylactoid reactions during the administration of anesthetics and/or contrast media. *J Investig Allergol Clin Immunol* 2008;18:1-11.
13. Burgdorff T, Venemalm L, Vogt T, Landthaler M, Stolz W. IgE-mediated anaphylactic reaction induced by succinate ester of methylprednisolone. *Ann Allergy Asthma Immunol* 2002;89:425-8.
14. Nakamura H, Matsuse H, Obase Y, et al. Clinical evaluation of anaphylactic reactions to intravenous corticosteroids in adult asthmatics. *Respiration* 2002;69:309-13.
15. Kim MH, Lee SM, Lee SH, et al. A case of chlorpheniramine maleate-induced hypersensitivity with aspirin intolerance. *Allergy Asthma Immunol Res* 2011;3:62-4.

## 지연성 과민반응의 예방

1. Otto K, Kaempgen E, Dummer W, Broecker EB, Becker JC. Late-type allergy to Ultravist (iopromid). *Allergy* 2003;58:261-2.
2. Sanchez-Perez J, MG FV, Ruiz SA, Garcia Diez A. Delayed hypersensitivity reaction to the non-ionic X-ray contrast medium Visipaque (iodixanol). *Contact Dermatitis* 2003;48:167.
3. Thomsen HS WJ. Contrast media: safety issues and ESUR guidelines 2014.
4. Romano A, Artesani MC, Andriolo M, Viola M, Pettinato R, Vecchioli-Scaldazza A. Effective prophylactic protocol in delayed hypersensitivity to contrast media: report of a case involving lymphocyte transformation studies with different compounds. *Radiology* 2002;225:466-70.
5. Bellin MF, Stacul F, Webb JA, et al. Late adverse reactions to intravascular iodine based contrast media: an update. *Eur Radiol* 2011;21:2305-10.
6. Lasser EC, Berry CC, Mishkin MM, Williamson B, Zheutlin N, Silverman JM. Pretreatment with corticosteroids to prevent adverse reactions to nonionic contrast media. *AJR Am J Roentgenol* 1994;162:523-6.
7. Morcos SK, Thomsen HS, Webb JA, Contrast Media Safety Committee of the European Society of Urogenital R. Prevention of generalized reactions to contrast media: a consensus report and guidelines. *Eur Radiol* 2001;11:1720-8.
8. Brockow K, Christiansen C, Kanny G, et al. Management of hypersensitivity reactions to iodinated contrast media. *Allergy* 2005;60:150-8.
9. Thomsen HS. Guidelines for contrast media from the European Society of Urogenital Radiology. *AJR Am J Roentgenol* 2003;181:1463-71.

## 요오드화 조영제의 혈관 외 사용

1. Ladas SD, Rokkas T, Kaskarelis J, Hatzioannou J, Raptis S. Absorption of iodized contrast media during ERCP. *Gastrointest Endosc* 1986;32:376.
2. Sable RA, Rosenthal WS, Siegel J, Ho R, Jankowski RH. Absorption of contrast medium during ERCP. *Dig Dis Sci* 1983;28:801-6.
3. Bilbao MK, Dotter CT, Lee TG, Katon RM. Complications of endoscopic retrograde cholangiopancreatography (ERCP). A study of 10,000 cases. *Gastroenterology* 1976;70:314-20.
4. Gmelin E, Kramann B, Weiss HD. [Complication with contrast medium in endoscopic retrograde cholangiopancreatography (author's transl)]. *MMW Munch Med Wochenschr* 1977;119:1439-40.
5. Draganov P, Cotton PB. Iodinated contrast sensitivity in ERCP. *Am J Gastroenterol* 2000;95:1398-401.
6. Moreira VF, Merono E, Larraona JL, et al. ERCP and allergic reactions to iodized contrast media. *Gastrointest Endosc* 1985;31:293.
7. Lorenz R. Allergic reaction to contrast medium after endoscopic retrograde pancreatography. *Endoscopy* 1990;22:196.
8. Draganov PV, Forsmark CE. Prospective evaluation of adverse reactions to iodine-containing contrast media after ERCP. *Gastrointest Endosc* 2008;68:1098-101.
9. Pan JJ, Draganov PV. Adverse reactions to iodinated contrast media administered at the time of endoscopic retrograde cholangiopancreatography (ERCP). *Inflamm Allergy Drug Targets* 2009;8:17-20.

10. Mishkin D, Carpenter S, Croffie J, et al. ASGE Technology Status Evaluation Report: radiographic contrast media used in ERCP. *Gastrointest Endosc* 2005;62:480-4.
11. Massey JC, Gokhale JA, Kay CL, Griffith JP. A case of common bile duct stones, failed ERCP and sensitivity to iodine contrast media: what contrast media should we use for an on-table cholangiogram? *Ann R Coll Surg Engl* 2008;90:615.
12. Natsume M, Sano H, Fukusada S, et al. [Gadolinium as an alternative radiocontrast agent in patients with allergy to iodine-based contrast provide for useful diagnostic imagings and safely treatment of biliary tract diseases]. *Nihon Shokakibyō Gakkai Zasshi* 2013;110:825-32.
13. Lawrence C, Cotton PB. Gadolinium as an alternative contrast agent for therapeutic ERCP in the iodine-allergic patient. *Endoscopy* 2009;41:564-7.
14. Martin Arranz E, Rey Sanz R, Martin Arranz MD, Gea Rodriguez F, Mora Sanz P. [Use of gadolinium as contrast agent in endoscopic retrograde cholangiopancreatography in patients with iodine allergy]. *Gastroenterol Hepatol* 2011;34:672-7.
15. Maluf-Filho F, Rocha MS, Sakai P. Use of a neutral gadolinium chelate as a contrast medium for ERCP: case report. *Gastrointest Endosc* 2005;61:917-8.
16. Mergener K. Complications of endoscopic and radiologic investigation of biliary tract disorders. *Curr Gastroenterol Rep* 2011;13:173-81.

## 1. 주사용 요오드화 조영제 사용에 대한 설명문

|         |  |     |  |       |  |    |  |
|---------|--|-----|--|-------|--|----|--|
| 등록번호    |  | 성명  |  | 성별    |  | 연령 |  |
| 진료과병실   |  | 처방일 |  | 시행예정일 |  |    |  |
| 검사명(부위) |  |     |  |       |  |    |  |
| 진단명     |  |     |  |       |  |    |  |

### 1-1. 영상의학 검사에 사용되는 요오드화 조영제란 무엇인가요?

CT와 같이 X선을 이용한 검사에서 영상의 대조도를 높여 병변을 명확하게 구별해 내는데 도움을 주는 요오드제제 약품입니다. X선을 이용하는 영상의학 검사는 인체를 통과하는 X선 흡수 정도의 차이를 영상화하는 검사법인 데 요오드성분을 함유하는 조영제가 각 조직에 분포되어 X선 흡수 차이를 크게 나타나게 하여 조직 간의 영상 대조도를 높여 병변을 명확하게 구별해 내는데 도움을 주는 약품입니다. 조영제는 CT 검사에서와 같이 주로 정맥주사를 하게 되며 특정 부위에 주사나 도관으로 주입할 수도 있습니다. 보다 정확한 영상진단 혹은 영상유도하 시술을 위하여 조영제 사용이 필수적인 경우가 많으며, 영상검사 방법에 따라 조영제를 사용하여 얻을 수 있는 효과와 환자에게 발생할 수 있는 위험성을 고려하여 조영제 사용 유무를 결정하게 됩니다.

### 1-2. 조영제 주입 시 발생할 수 있는 과민반응이나 유해반응은 어떤 것이 있나요?

우리 몸에 투약되는 다른 약들처럼 조영제도 급성 혹은 지연성 과민반응이나 유해반응이 있을 수 있습니다.

조영제 주입 후 바로 얼굴, 가슴, 복부의 후끈거림, 입의 약 냄새, 혹은 조영제 주입 부위에 약간의 온 열감 등이 있을 수 있는데, 이는 조영제가 우리 몸속으로 혈관을 따라 퍼지면서 느끼게 되는 정상적인 반응입니다.

그 이외에 의료진의 처치가 필요한 조영제 관련 과민반응이나 유해반응이 드물게 있을 수 있습니다. 의료진에게 알리고 적절한 치료 지침을 따라야 하는 조영제 유해반응은 발생 시기와 심한 정도에 따라서 다음과 같이 나눌 수 있습니다.

#### <급성 유해반응>

급성 유해반응은 조영제 주입 후 1시간 이내에 일어나는 유해반응을 말하며, 중등도의 정도에 따라 아래 표와 같이 경증, 중등증, 중증으로 나뉩니다.

|     | 과민반응                                                                                                | 생리적 반응(기타 유해반응)                                                                         |
|-----|-----------------------------------------------------------------------------------------------------|-----------------------------------------------------------------------------------------|
| 경증  | 국소적인 두드러기·가려움증<br>국소적인 피부 부종<br>목(인후두) 가려움<br>코 충혈, 재채기, 콧물, 결막염                                    | 경미한 메스꺼움·구토<br>일시적인 화끈거림·열감·오한<br>두통, 어지러움, 불안, 맛의 변화<br>경증 고혈압<br>저절로 호전되는 혈관미주신경항진 반응 |
| 중등증 | 광범위한 두드러기·가려움증<br>광범위한 홍반<br>안면부종<br>목이 붓거나 씹<br>저산소증이 없는 천명, 기도수축                                  | 지속되는 메스꺼움·구토<br>홍통<br>고혈압성 긴급증(hypertensive urgency)<br>치료가 필요한 혈관미주신경항진 반응             |
| 중증  | 호흡곤란을 동반한 심한 부종과 안면부종<br>저혈압을 동반한 심한 홍반<br>그렁거림/저산소증을 동반한 후두부종<br>심한 저산소증이 있는 천명, 기도수축<br>아나필락시스 쇼크 | 부정맥<br>경련<br>고혈압성 응급증(hypertensive emergency)<br>치료를 반응하지 않는 혈관미주신경항진 반응                |

#### <지연성 유해반응>

지연성 유해반응은 조영제 주입 후 1시간에서 1주일 사이에 나타나는 유해반응입니다. 피부 병변들(예, 발진, 홍반, 가려움증 등)이 조영제 사용과 관련하여 나타날 수 있으며, 대부분은 심하지 않고 저절로 호전됩니다. 그 외에도 다양한 후기 증상들(예, 구역, 구토, 두통, 근골격통, 발열)을 조영제 주사 후에 호소하는 사례들이 있으나, 많은 경우 조영제와 직접적인 관련성은 없다고 알려져 있습니다.

#### 1-3. 조영제의 신독성

조영제 신독성이란 조영제 정맥주사 후 3일 이내에 특별한 다른 원인 없이 신장독성이 발생하여 신장기능이 저하되는 상태를 일컫습니다(기존에 신장기능이 저하된 환자나 70세 이상의 고령자에서 발생 위험이 높아질 수 있습니다).

#### 1-4. 조영제 주사와 관련해서 발생할 수 있는 기타 유해반응은 다음과 같은 것들이 있습니다.

조영제 주입 시 혈관 외 유출, 갑상선중독증, 폐혈관저항의 증가, 폐부종, 혈전증 등

#### 1-5. 조영제 부작용에 의한 사망률은 얼마나 되나요?

조영제에 의하여 과민반응을 일으켜 사망에 이르는 경우는 매우 드뭅니다. 조영제의 종류, 보고자, 보고 시기에 따라 조영제 관련 사망률이 약 1/75000-약 1/1200000의 빈도로 다양하게 보고되어 있으며 대략 10만 명에 1명 정도입니다.

#### 1-6. 임신과 수유

X-선을 이용하는 영상의학 검사가 꼭 필요한 예외적인 경우, 의사의 판단에 따라 요오드화 조영제를 임신한 여성에게 사용할 수 있으며, 이런 경우에는 출산 첫 주 이내에 신생아의 갑상선기능을 확인하는 것이 필요합니다. 신장기능이 정상인 경우 요오드화 조영제를 주입한 경우에도 정상적인 모유수유가 가능합니다

### 1-7. 조영제 부작용을 줄이기 위한 검사 전 확인사항

조영제를 주입하는 영상의학검사를 고려 중인 피검사자는 다음의 체크리스트에 해당사항이 있는지를 확인하여 주시고, 해당사항이 있는 경우 담당 의사에게 알려주십시오.

|                              |         |                          |         |
|------------------------------|---------|--------------------------|---------|
| 요오드화 조영제에 중등도 또는 중증 유해반응 과거력 | 예 / 아니오 | 현재 임신 중이거나 임신 가능성이 있습니까? | 예 / 아니오 |
| 알레르기 질환                      | 예 / 아니오 | 갑상샘 항진증                  | 예 / 아니오 |
| 천식 병력                        | 예 / 아니오 | 심부전                      | 예 / 아니오 |
| 당뇨병                          | 예 / 아니오 | 신장 질환이나 신부전의 병력          | 예 / 아니오 |
| 과거 신장 수술                     | 예 / 아니오 | 단백뇨 병력                   | 예 / 아니오 |
| 고혈압                          | 예 / 아니오 | 통풍                       | 예 / 아니오 |

현재 복용하고 계신 약제 중 다음에 해당하는 약이 있는지 확인하십시오(만약 정확한 약품명을 알 수 없다면, 약 처방을 받은 주치의의 통하하여 확인 바랍니다).

|                              |         |
|------------------------------|---------|
| 메트포르민(당뇨병 치료제)               | 예 / 아니오 |
| 인터류킨2(신장세포암, 흑색종 등에서의 항암치료제) | 예 / 아니오 |
| 비코르티코스테로이드항염증제(진통소염제)        | 예 / 아니오 |
| 아미노글라이코사이드계(항생제)             | 예 / 아니오 |
| 베타차단제(혈압, 부정맥 치료제)           | 예 / 아니오 |



## 2. MRI용 가돌리늄 조영제 사용에 대한 설명문

|         |  |     |  |       |  |    |  |
|---------|--|-----|--|-------|--|----|--|
| 등록번호    |  | 성명  |  | 성별    |  | 연령 |  |
| 진료과병실   |  | 처방일 |  | 시행예정일 |  |    |  |
| 검사명(부위) |  |     |  |       |  |    |  |
| 진단명     |  |     |  |       |  |    |  |

### 2-1. MRI 검사에 사용되는 가돌리늄 조영제란 무엇인가요?

MRI는 자석을 이용한 의료장비를 이용하여 인체의 자성을 특성화시키고, 이를 영상화하여 질병을 찾는 영상진단 방법입니다. 조영제란 적절한 영상 진단 검사를 위해 인위적으로 영상의 대조도를 높이기 위해 인체에 투여되는 의약품을 말하며, MRI에는 가돌리늄 원소를 함유하는 조영제가 사용됩니다. 가돌리늄 조영제는 정맥주사를 통하여 주입되며, 혈관을 통해 퍼진 후 주로 신장을 통해 배출됩니다.

### 2-2. 가돌리늄 조영제 주입 시 발생할 수 있는 유해반응은 어떤 것이 있나요?

우리 몸에 투약되는 다른 약들처럼 조영제도 급성 혹은 지연성 과민반응이나 유해반응이 있을 수 있습니다. 가돌리늄 조영제를 투여받은 환자에서 발생한 급성 유해반응의 빈도는 0.07%~2.4% 정도로 CT에서 사용되는 요오드화 조영제를 투여했을 때보다는 적습니다. 특히 알레르기 및 천식 등의 환자, 또한 과거 조영제를 포함한 약물 부작용 경험이 있는 경우 빈도가 높기 때문에 사전에 의료진에게 알리고 적절한 예방 및 치료 지침을 따라야 합니다. 의료진에게 알리고 적절한 치료 지침을 따라야 하는 조영제 유해반응은 발생 시기와 심한 정도에 따라 다음과 같이 나눌 수 있습니다.

#### <급성 유해반응>

조영제 주입 후 1시간 이내에 나타나는 유해반응을 말하며, 중증도의 정도에 따라 아래 표와 같이 경증, 중등증, 중증으로 나눕니다.

|     | 과민반응                                                                                                | 생리적 반응(기타 유해반응)                                                                         |
|-----|-----------------------------------------------------------------------------------------------------|-----------------------------------------------------------------------------------------|
| 경증  | 국소적인 두드러기·가려움증<br>국소적인 피부 부종<br>목(인후두) 가려움<br>코 충혈, 재채기, 콧물, 결막염                                    | 경미한 메스꺼움·구토<br>일시적인 화끈거림·열감·오한<br>두통, 어지러움, 불안, 맛의 변화<br>경증 고혈압<br>저절로 호전되는 혈관미주신경항진 반응 |
| 중등증 | 광범위한 두드러기·가려움증<br>광범위한 홍반<br>안면부종<br>목이 붓거나 씹<br>저산소증이 없는 천명, 기도수축                                  | 지속되는 메스꺼움·구토<br>홍통<br>고혈압성 긴급증(hypertensive urgency)<br>치료가 필요한 혈관미주신경항진 반응             |
| 중증  | 호흡곤란을 동반한 심한 부종과 안면부종<br>저혈압을 동반한 심한 홍반<br>그렁거림/저산소증을 동반한 후두부종<br>심한 저산소증이 있는 천명, 기도수축<br>아나필락시스 쇼크 | 부정맥<br>경련<br>고혈압성 응급증(hypertensive emergency)<br>치료에 반응하지 않는 혈관미주신경항진 반응                |

<지연성 유해반응>

조영제 주입 후 1시간 이후(대개 1개월 이후) 나타나는 유해반응을 말하며, 이에 드물지만 심각한 피부 질환인 신원성전 신섬유증이 있습니다. 식품의약품안전청에서는 미국 FDA의 권고사항을 근거로 2010년 신원성전신섬유증의 위험에 대한 정보를 발표하였습니다.

2-3. 가돌리늄 조영제 부작용에 의한 사망률은 얼마나 되나요?

가돌리늄 조영제에 의하여 유해반응을 일으켜 사망에 이르는 경우는 매우 드물고 CT 조영제보다 빈도가 낮습니다. 심한 중증 유해반응의 빈도는 약 0.005%~0.01%로 알려져 있습니다.

2-4. 임신과 모유수유 중인 환자의 가돌리늄 조영제 사용 여부

임산부에서 가돌리늄 조영제에 의해 기형아나 다른 부작용이 발생했다는 보고는 없습니다. 그러나 임산부에서 태반을 통해 태아에게 조영제가 전달되고 태아에게 어떤 영향을 끼칠지 모르기 때문에 임산부에서는 가능한 한 가돌리늄 조영제의 사용을 피해야 합니다. 그러나 조영제 사용이 꼭 필요하다고 의뢰진이 판단한 경우 이익과 위험도를 고려하여 사용할 수 있습니다.

모유수유 중인 환자가 가돌리늄 조영제를 주입받은 경우, 이후 모유수유로 인해 아기에게 전달되는 가돌리늄의 양은 매우 적으며 부작용이 보고되지 않았습니다. 따라서 모유수유를 중단할 필요는 없으며 중단하더라도 검사 후 24시간 동안만 모유수유를 피하면 됩니다.

2-5. 가돌리늄 조영제 부작용을 줄이기 위한 검사 전 확인사항

조영제를 사용하는 MRI 검사가 예정된 피검사자는 다음의 항목 중에 해당사항이 있는지 확인하여 주시고, 해당사항이 있는 경우 담당 의사에게 알려주십시오.

|                                                                                           |         |
|-------------------------------------------------------------------------------------------|---------|
| 조영제(요오드화 또는 가돌리늄 조영제)에 중등도 및 중증 유해반응 과거력                                                  | 예 / 아니오 |
| 특정 약물에 대한 알레르기(약물 이름 _____)                                                               | 예 / 아니오 |
| 알레르기 질환                                                                                   |         |
| 천식 병력                                                                                     | 예 / 아니오 |
| 신장질환, 과거 신장 수술, 신부전의 병력                                                                   | 예 / 아니오 |
| eGFR    30-59 mL/min/1.73 cm <sup>2</sup> _____    < 30 mL/min/1.73 cm <sup>2</sup> _____ |         |
| 현재 임신 또는 모유수유 중이거나 임신 가능성이 있습니까?                                                          | 예 / 아니오 |
| 소아입니까?                                                                                    | 예 / 아니오 |
| 연령    4주 미만 _____    1세 미만 _____                                                          |         |

### 3. 동의서

본인(또는 환자)에 대한 검사의 목적 및 효과, 검사의 과정 및 방법, 검사 전후의 주의사항, 검사 중 발생할 수 있는 문제점, 검사 후 발생 가능한 증상, 시행 가능한 다른 검사 방법, 검사를 받지 않은 경우 등에 대한 설명을 의사로부터 듣고 이해하였습니다.

본 검사로서 불가항력으로 야기될 수 있는 합병증 또는 환자의 특이체질로 우발적 사고가 일어날 수 있다는 것을 충분히 이해하였습니다.

환자 또는 환자 대리인의 이름/서명( )

- 만일 검사에 따른 부작용 발생 시 의학적 처리 등의 제반 사항을 귀 병원에 위임하기로 합니다.

- 본 동의서의 인쇄된 정보를 충분히 이해했으며, 본인의 자발적인 이해에 근거하여 이 동의서에 서명하며 검사를 신청합니다.

주치의(설명 의사): \_\_\_\_\_ (서명) \_\_\_\_\_ 일시: \_\_\_\_\_

환자 성함: \_\_\_\_\_ (서명) \_\_\_\_\_ 일시: \_\_\_\_\_

주소: \_\_\_\_\_

대리인(환자의 ): \_\_\_\_\_ (서명) \_\_\_\_\_ 일시: \_\_\_\_\_

주소: \_\_\_\_\_

#### 대리 사유:

환자의 신체/정신적 장애로 인하여 약정내용에 대하여 이해를 하지 못함

미성년자로서 약정 내용에 대하여 이해하지 못함

설명하는 것이 환자의 심신에 중대한 나쁜 영향을 미칠 것이 명백함

환자 본인이 승낙에 관한 권한을 특정인에게 위임함

(이 경우 별도의 위임 계약서 혹은 위임장을 본 동의서에 첨부하여야 합니다.)

기타( )

## 4. 검사 전 확인사항

### 4-1. 주사용 요오드화 조영제의 사용을 의뢰하는 임상의를 위한 확인사항

- |                                                 |         |
|-------------------------------------------------|---------|
| 1. 요오드화 조영제에 중등도 또는 중증 반응이 있었던 병력               | 예 / 아니오 |
| 2. 치료가 필요했던 알레르기 질환의 병력                         | 예 / 아니오 |
| 3. 천식 병력                                        | 예 / 아니오 |
| 4. 갑상샘항진증                                       | 예 / 아니오 |
| 5. 심장질환(심부전, 협심증, 대동맥 협착, 일차성 폐고혈압, 심근병증)       | 예 / 아니오 |
| 6. 당뇨병                                          | 예 / 아니오 |
| 7. 신장 질환의 병력                                    | 예 / 아니오 |
| 8. 과거 신장 수술                                     | 예 / 아니오 |
| 9. 단백뇨 병력                                       | 예 / 아니오 |
| 10. 고혈압                                         | 예 / 아니오 |
| 11. 통풍                                          | 예 / 아니오 |
| 12. 가장 최근에 측정한 혈청 크레아티닌<br>수치 _____<br>날짜 _____ |         |
| 13. 환자가 현재 복용하고 있는 약제                           |         |
| • 메트포르민                                         | 예 / 아니오 |
| • 인슐린2                                          | 예 / 아니오 |
| • 비코르티코스테로이드항염증제                                | 예 / 아니오 |
| • 아미노글라이코사이드계                                   | 예 / 아니오 |
| • 베타차단제                                         | 예 / 아니오 |

### 4-2. 가돌리늄 조영제의 사용을 의뢰하는 임상의를 위한 확인사항

- |                                                          |         |
|----------------------------------------------------------|---------|
| 1. 가돌리늄 조영제에 중등도 또는 중증 반응이 있었던 병력                        | 예 / 아니오 |
| 2. 치료가 필요했던 알레르기 질환의 병력                                  | 예 / 아니오 |
| 3. 천식 병력                                                 | 예 / 아니오 |
| 4. 말기신부전( $eGFR < 30 \text{ mL/min/1.73 m}^2$ ) 또는 투석 여부 | 예 / 아니오 |

## 5. 자발적 조영제 부작용 보고

### 5-1. 자발적 부작용 보고는 무엇인가요?

- WHO의 정의에 따르면 자발적 부작용 보고는 “의사, 약사, 간호사 등 보건의료전문가와 제조업자가 국가약물감시센터에 약물유해반응에 대한 사례보고를 자발적으로 제출하는 시스템”을 의미합니다.

### 5-2. 자발적 부작용 보고는 왜 필요한가요?

- 의약품의 안전성은 임상시험에서 모두 확인되지 않으며, 자발적 부작용 보고를 통해 초기 임상시험 및 시판 전 임상시험에서 나타나지 않았던 드물게 나타나는 부작용을 탐지할 수 있기 때문에 의약품의 시판 후 안전성에 관한 정보를 파악하는데 있어서 중요한 역할을 합니다.

- 취약군에 대한 정보와 위해 요소에 대한 정보, 그리고 이미 알려진 중대한 약물유해반응의 발현율 등 임상적 양상에 대한 정보를 제공합니다.

### 5-3. 조영제 부작용은 어떻게 보고하나요?

- 한국의약품안전관리원 홈페이지를 통해 의약품부작용보고시스템(Korea Adverse Event Reporting System; 이하 KAERS)에 보고합니다. 이 외에도 E-mail, 전화, 팩스, 우편으로도 보고할 수 있습니다.

| 한국의약품안전관리원 |                                                                     |        |                               |
|------------|---------------------------------------------------------------------|--------|-------------------------------|
| 홈페이지       | <a href="https://www.drugsafe.or.kr">https://www.drugsafe.or.kr</a> | E-mail | kids_qna@drugsafe.or.kr       |
| 전화         | 1644-6223 (팩스: 02-2172-6702)                                        | 주소     | 경기도 안양시 동안구 부림로 169번길 30 5,6층 |

#### <지역의약품안전센터>

우리나라는 지역별로 상급종합병원 등을 ‘지역의약품안전센터’로 지정하여 지역센터에서 수집한 부작용을 중앙(한국의약품안전관리원 및 식품의약품안전처)에서 관리하는 분권화된 약물감시 시스템을 운영하고 있습니다.

(지역센터관련 정보는 한국의약품안전관리원 홈페이지 → 알림마당 → 지역의약품안전센터에서 확인하실 수 있음)

#### 5-4. 조영제 관련 어떤 부작용이 보고되었나요?

- 조영제와 관련된 부작용으로 주로 두드러기, 가려움증 등과 같은 과민반응이 보고되었습니다.

| 조영제 부작용 보고현황(기간: 2011~2016.3) |     |
|-------------------------------|-----|
| 증상                            | 비율  |
| 두드러기                          | 30% |
| 가려움증                          | 24% |
| 구토                            | 8%  |
| 오심                            | 8%  |
| 발진                            | 6%  |
| 어지러움                          | 3%  |
| 기타                            | 20% |

#### 5-5. 자발적 부작용 보고는 어떻게 활용되나요?

- 한국의약품안전관리원은 의약품부작용보고시스템(KAERS)으로 수집된 부작용 정보를 활용하여 안전정보를 생산·제공하고 있습니다. KAERS 데이터베이스는 국제 약물감시 프로그램과 호환되며 주기적으로 세계보건기구-약물부작용모니터링센터(웁살라모니터링센터)로 전송됩니다.

| KAERS (의약품부작용보고시스템) 주요 기능 및 활용 |                                                       |
|--------------------------------|-------------------------------------------------------|
| 부작용 보고 접수                      | 일반인(소비자), 의약전문가, 제조 및 수입업체에서 인지된 부작용을 KAERS에 보고       |
| 부작용 분석 평가                      | 부작용 보고자료를 바탕으로 실마리 정보 분석 등을 통해 안전정보 생산                |
| 안전정보 제공                        | 허가사항 변경 등 안전조치 내용 전파<br>웁살라모니터링센터에 주기적으로 국내 부작용 정보 송부 |
